# Supplementary material for: Microbial Transformation of the Sesquiterpene Lactone, Vulgarin, by Aspergillus niger
Source: MDPI journal article supplement (doi:10.3390/molecules28093729), 2023-04-26
Supplement: s1 [file s1]

## Supporting information

# Microbial Transformation of the Sesquiterpene Lactone, Vulgarin, by *Aspergillus niger*

Reem A. ElGamal<sup>1</sup>, Amal A. Galala<sup>1</sup>, Maged S. Abdel-Kader<sup>2,3</sup>, Farid A. Badria<sup>1,\*</sup> and Amal F. Soliman<sup>1</sup>

<sup>1</sup> Pharmacognosy Department, Faculty of Pharmacy, Mansoura University, El Mansoura 35516, Egypt

<sup>2</sup> Department of Pharmacognosy, College of Pharmacy, Prince Sattam Bin Abdulaziz University, Al-Kharj 11942, Saudi Arabia

<sup>3</sup> Department of Pharmacognosy, Faculty of Pharmacy, Alexandria University, Alexandria 21215, Egypt

### \*Corresponding authors:

Farid A. Badria Tel.: (+20)1001762927

E-mail address: faridbadria@gmail.com, badri002@mans.edu.eg ORCID: [https://](https://orcid.org/0000-0001-7230-3105)

[orcid.org/0000-0001-7230-3105](https://orcid.org/0000-0001-7230-3105)

### Co-authors E-mails:

Reem A. ElGamal: reem.a.elgamal@hotmail.com

Amal A. Galala: amal\_galala@yahoo.com

Maged S. Abdel-Kader: m.youssef@psau.edu.sa

Amal F. Soliman: ORCID: [https://](https://orcid.org/0000-0003-3320-0685)

[orcid.org/0000-0003-3320-0685](https://orcid.org/0000-0003-3320-0685)

| Table of Contents                                                                     | Page |
|---------------------------------------------------------------------------------------|------|
| <b>Figure S1.</b> <sup>1</sup> H NMR spectrum of (1) (CDCl <sub>3</sub> , 700 MHz).   | 3    |
| <b>Figure S2.</b> COSY spectrum of (1)                                                | 4    |
| <b>Figure S3.</b> <sup>13</sup> C-NMR spectrum of (1) (CDCl <sub>3</sub> , 175 MHz).  | 5    |
| <b>Figure S4.</b> DEPT 135 spectrum of (1)                                            | 6    |
| <b>Figure S5.</b> HSQC spectrum of (1)                                                | 7    |
| <b>Figure S6.</b> HMBC spectrum of (1)                                                | 8    |
| <b>Figure S7.</b> FAB-MS spectrum of (2)                                              | 9    |
| <b>Figure S8.</b> <sup>1</sup> H-NMR spectrum of (2) (CDCl <sub>3</sub> , 500 MHz).   | 10   |
| <b>Figure S9.</b> COSY spectrum of (2)                                                | 11   |
| <b>Figure S10.</b> NOESY spectrum of (2)                                              | 12   |
| <b>Figure S11.</b> <sup>13</sup> C-NMR spectrum of (2) (CDCl <sub>3</sub> , 125 MHz). | 13   |
| <b>Figure S12.</b> HRESIMS spectrum of (3a)                                           | 14   |
| <b>Figure S13.</b> <sup>1</sup> H-NMR spectrum of (3a) (CDCl <sub>3</sub> , 500MHz).  | 15   |
| <b>Figure S14.</b> COSY spectrum of (3a)                                              | 16   |
| <b>Figure S15.</b> NOESY spectrum of (3a)                                             | 17   |

|                                                                                                   |    |
|---------------------------------------------------------------------------------------------------|----|
| <b>Figure S16.</b> $^{13}\text{C}$ -NMR spectrum of ( <b>3a</b> ) ( $\text{CDCl}_3$ , 125 MHz).   | 18 |
| <b>Figure S17.</b> HSQC spectrum of ( <b>3a</b> )                                                 | 19 |
| <b>Figure S18.</b> HMBC spectrum of ( <b>3a</b> )                                                 | 20 |
| <b>Figure S19.</b> HRESIMS spectrum of ( <b>3a,b</b> )                                            | 21 |
| <b>Figure S20.</b> $^1\text{H}$ -NMR spectrum of ( <b>3a,b</b> ) ( $\text{CDCl}_3$ , 500 MHz).    | 22 |
| <b>Figure S21.</b> COSY spectrum of ( <b>3a,b</b> )                                               | 23 |
| <b>Figure S22.</b> $^{13}\text{C}$ -NMR spectrum of ( <b>3a,b</b> ) ( $\text{CDCl}_3$ , 125 MHz). | 24 |
| <b>Figure S23.</b> DEPT 135 spectrum of ( <b>3a,b</b> )                                           | 25 |
| <b>Figure S24.</b> HMBC spectrum of ( <b>3a,b</b> )                                               | 26 |
| <b>Figure S25.</b> HSQC spectrum of ( <b>3a,b</b> )                                               | 27 |

NMR spectra of vulgarin (**1**):

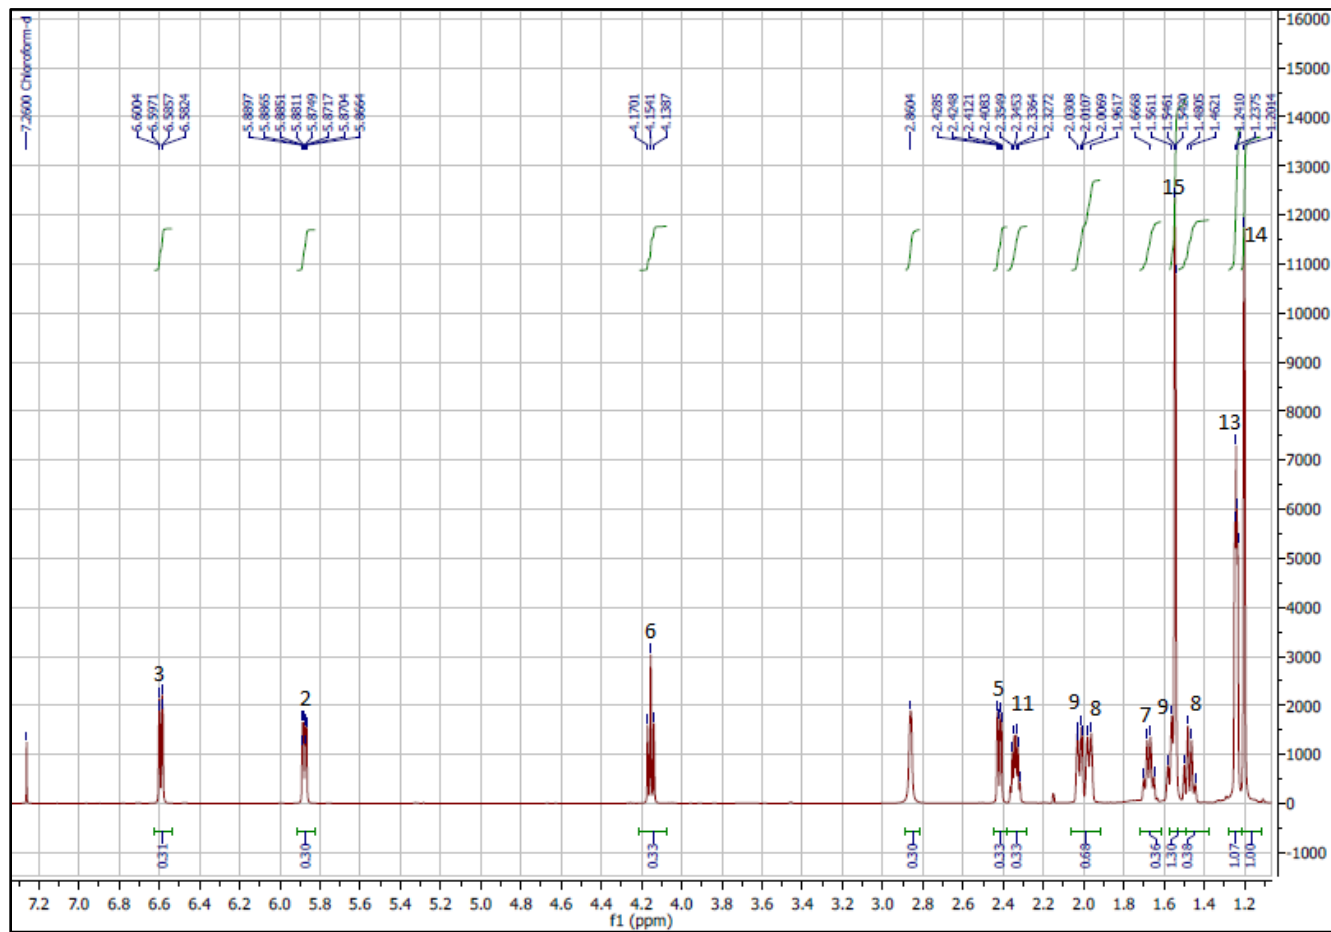

**Figure S1.**  $^1\text{H}$  NMR spectrum of vulgarin (**1**) ( $\text{CDCl}_3$ , 700 MHz).

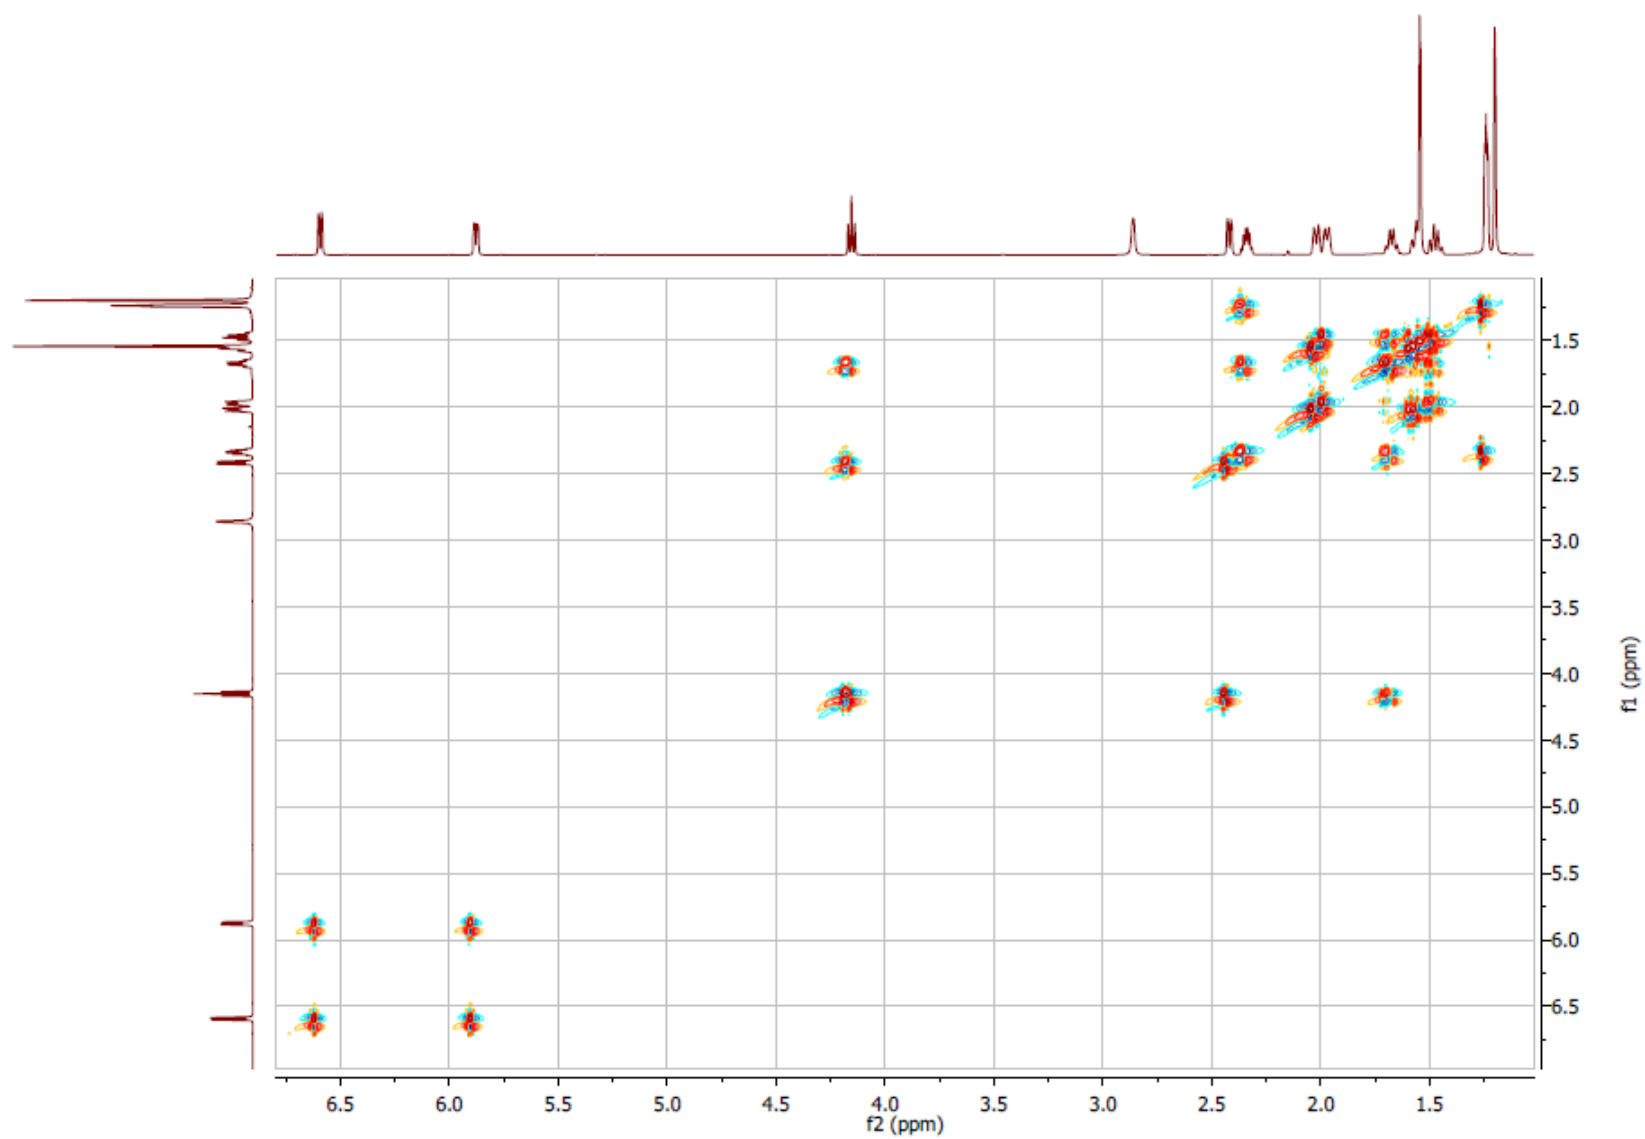

**Figure S2:** COSY spectrum of Vulgarin (1)

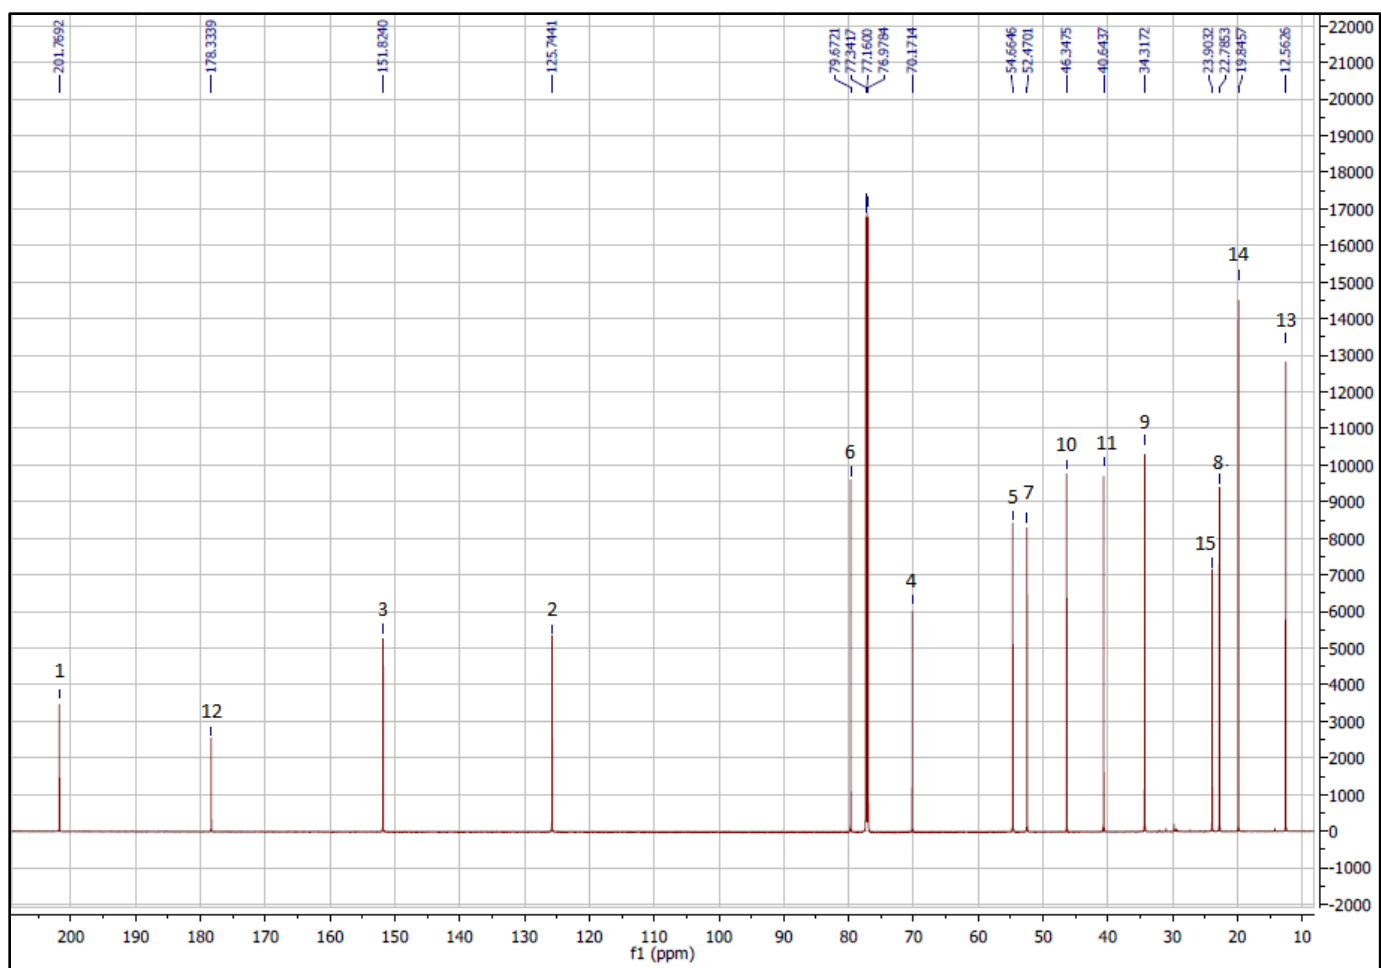

**Figure S3:**  $^{13}\text{C}$ -NMR spectrum of Vulgarin (1) ( $\text{CDCl}_3$ , 175 MHz).

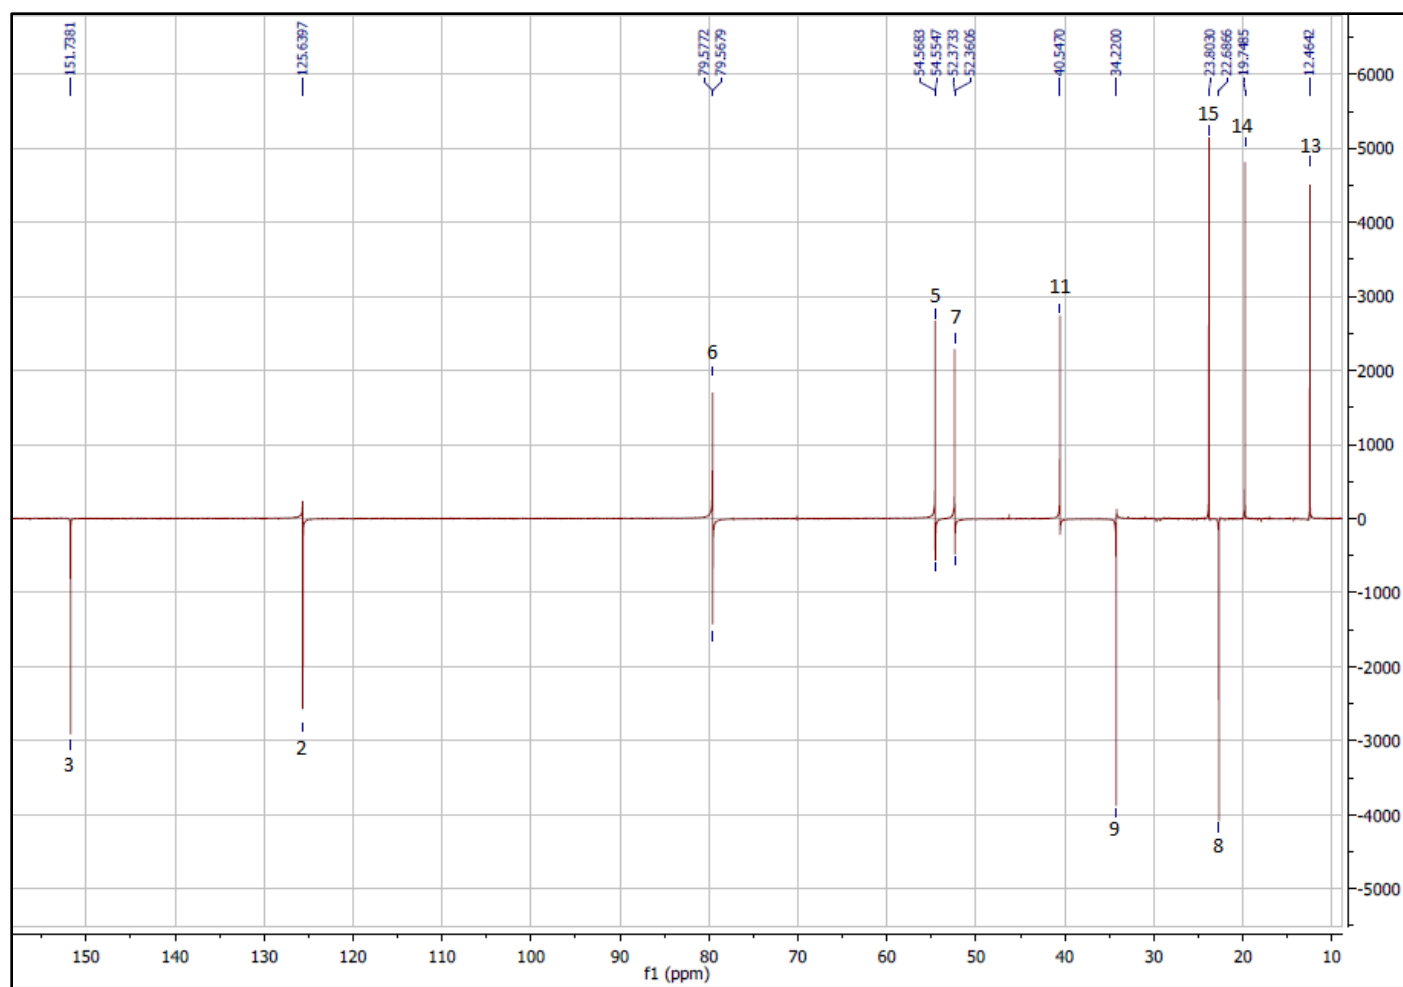

**Figure S4:** DEPT 135 spectrum of Vulgarin (1)

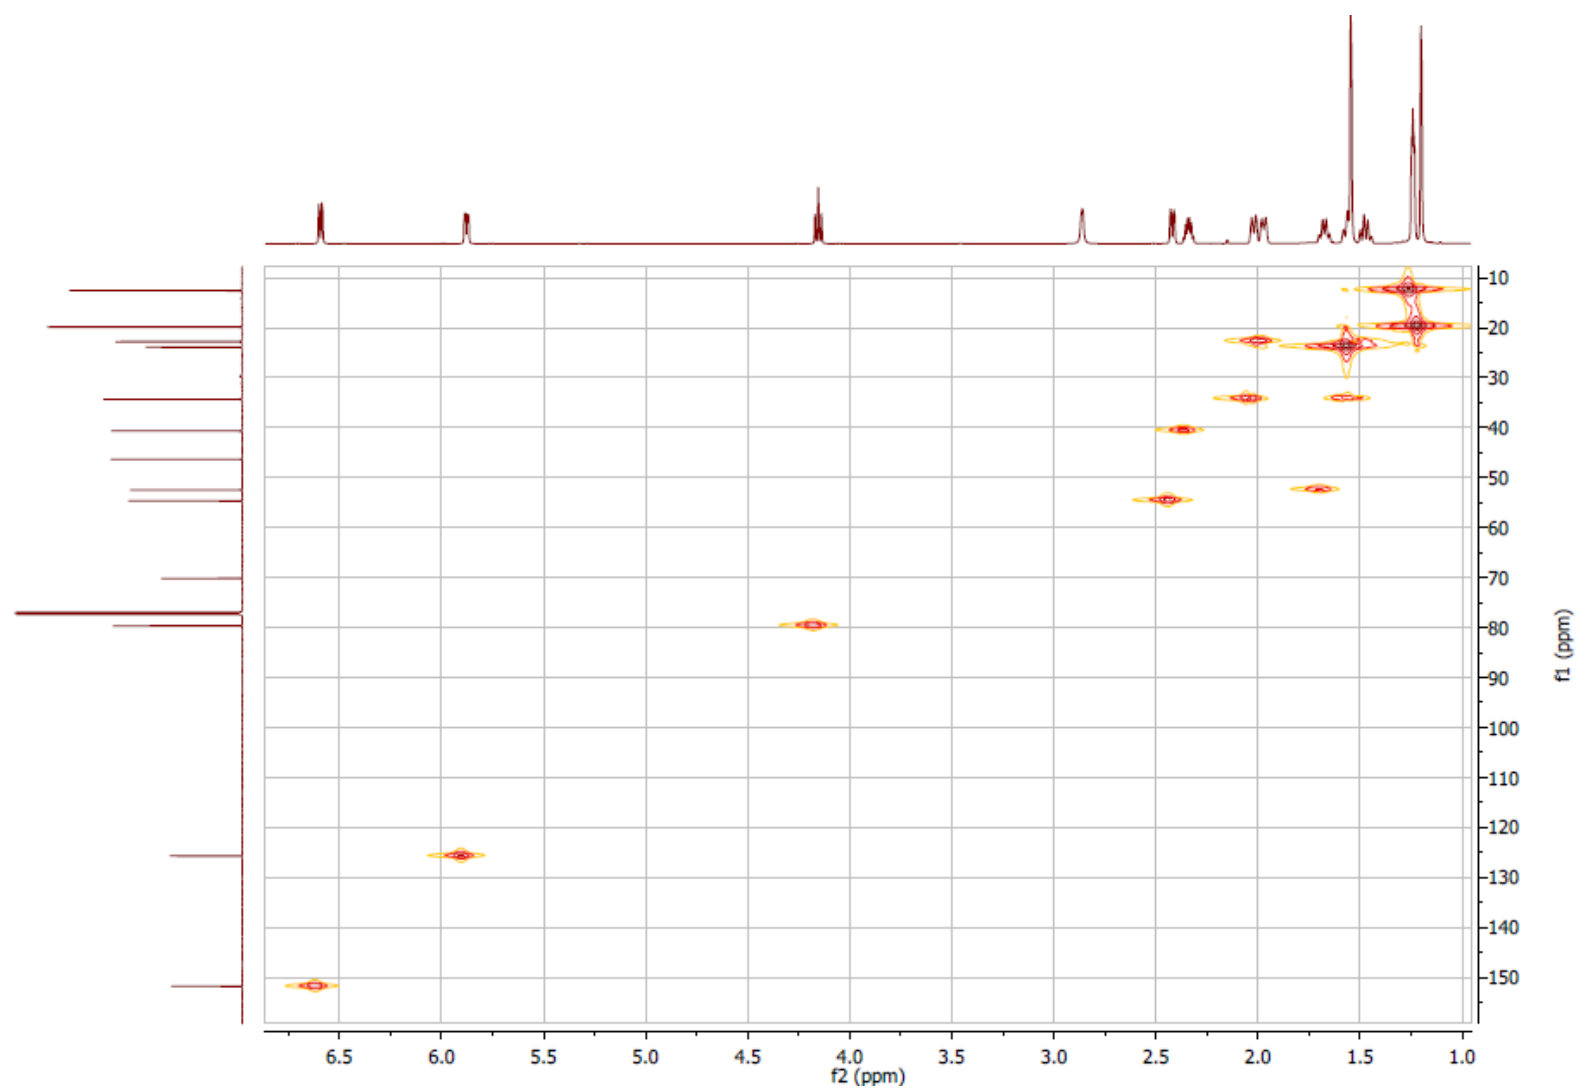

**Figure S5:** HSQC spectrum of Vulgarin (1)

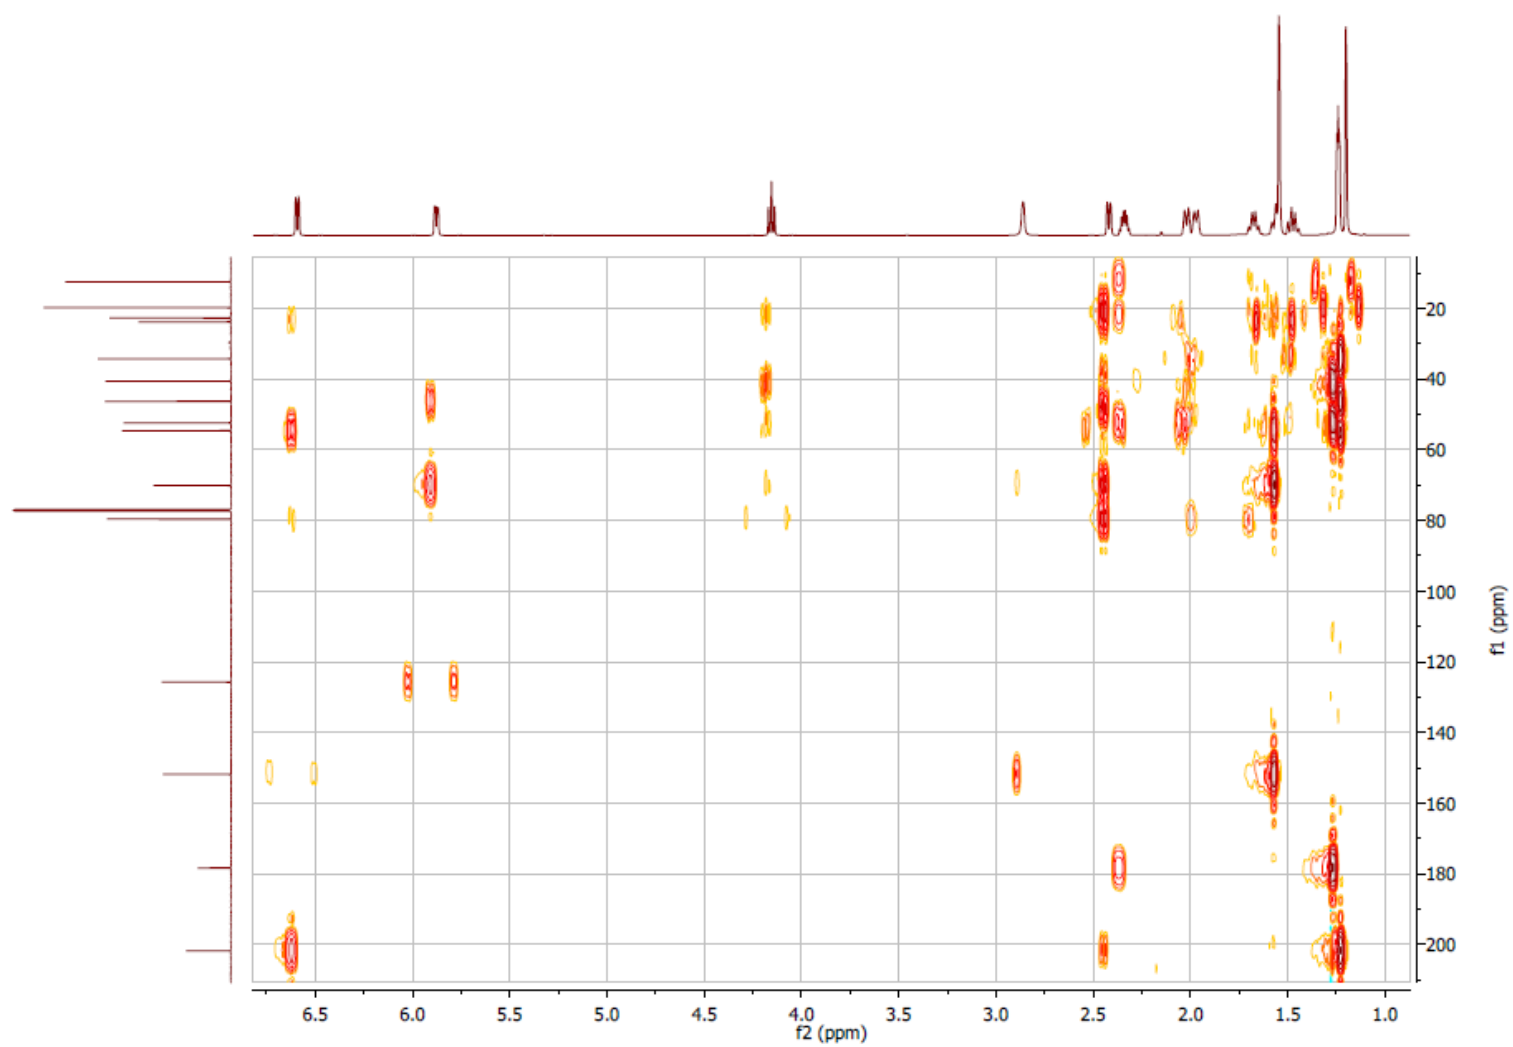

**Figure S6:** HMBC spectrum of Vulgarin (**1**)



## NMR spectra of first metabolite (2)

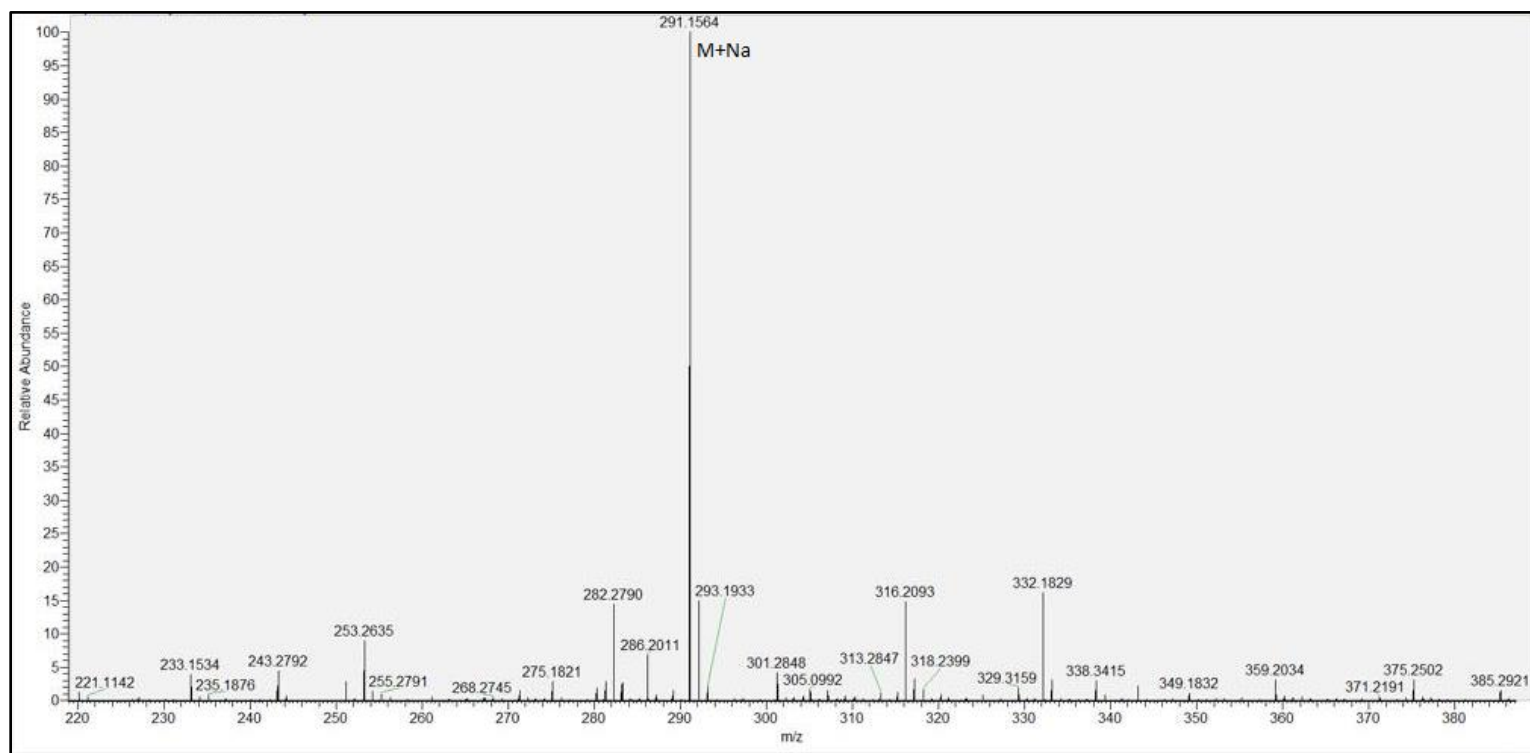

**Figure S7:** HRESIMS spectrum of (2)

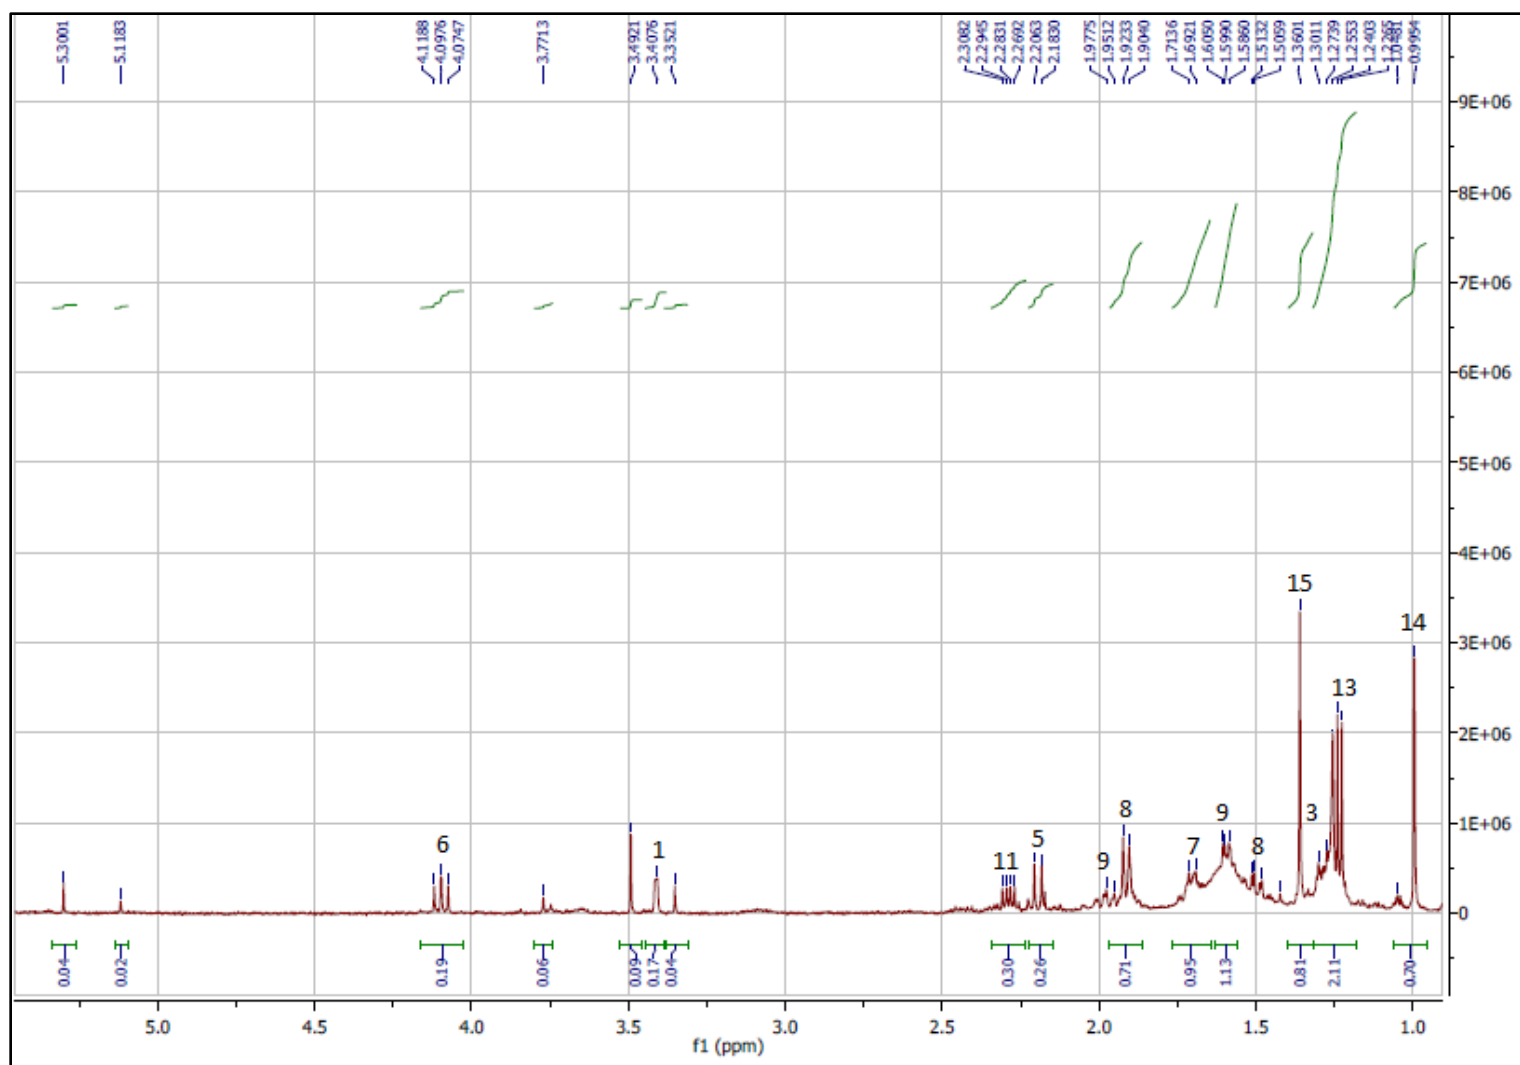

Figure S8:  $^1\text{H}$ -NMR spectrum of (2) ( $\text{CDCl}_3$ , 500 MHz).

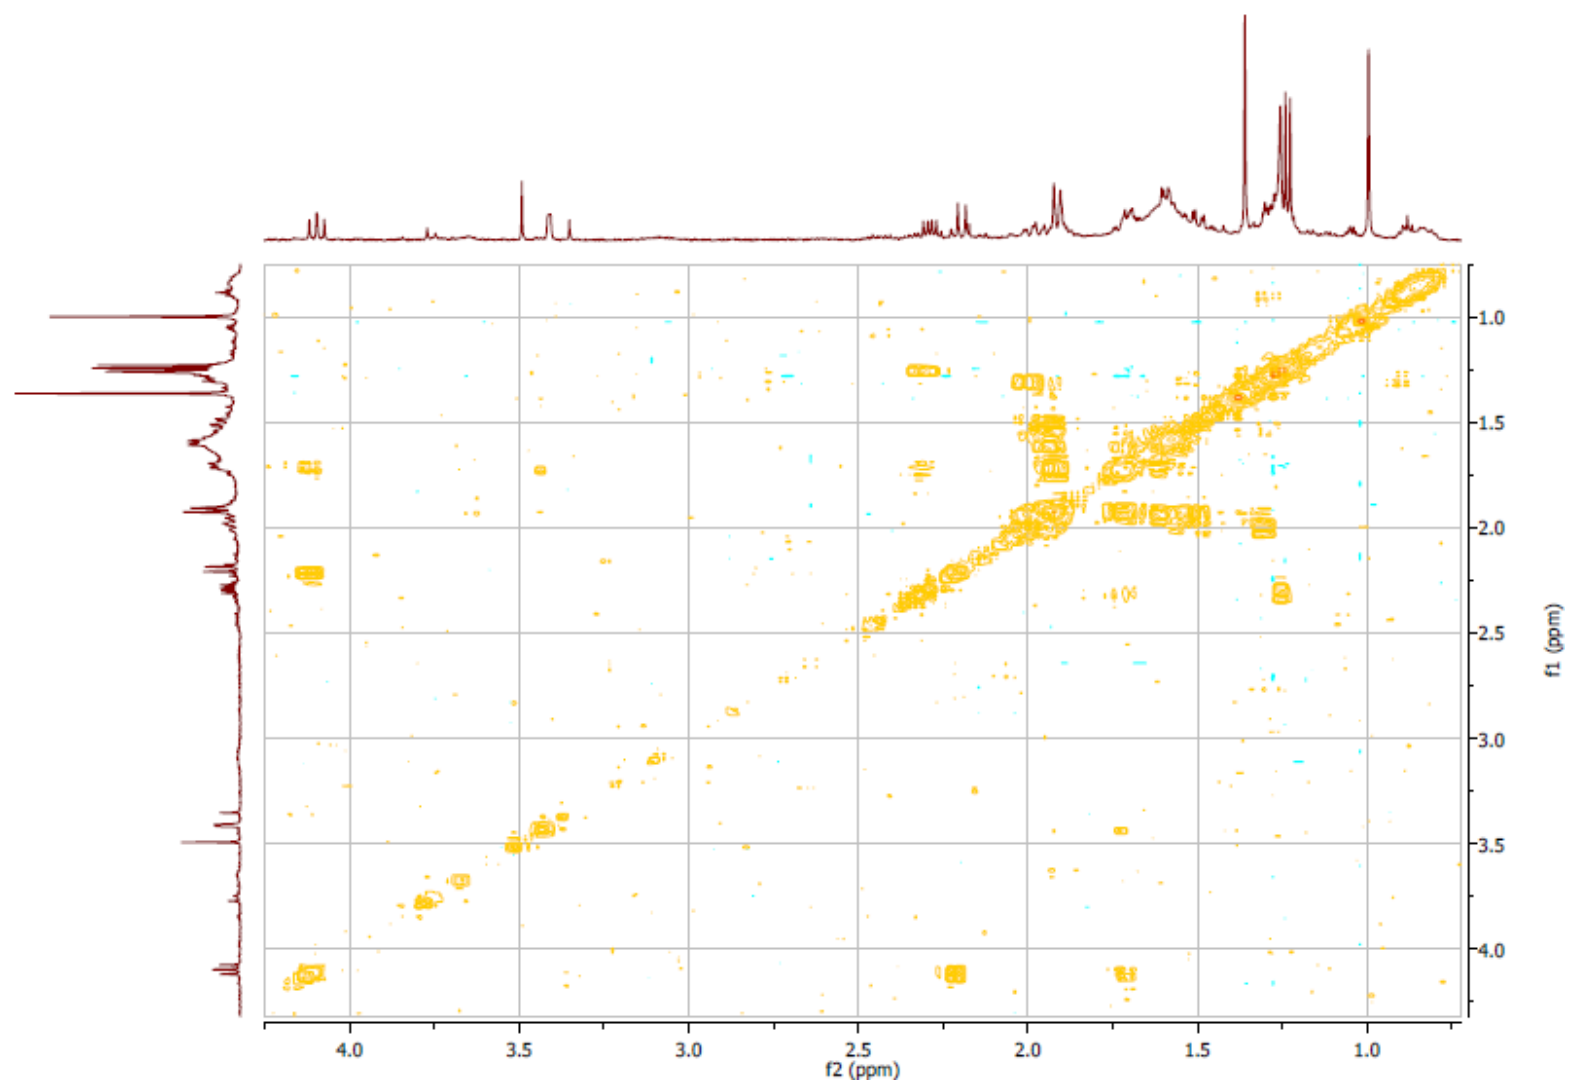

**Figure S9:** COSY spectrum of (2)

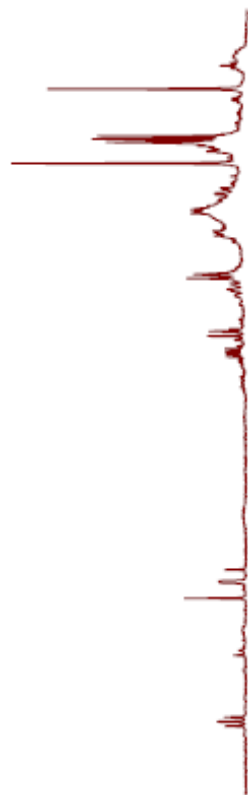

**Figure 10:** NOESY spectrum of (2)

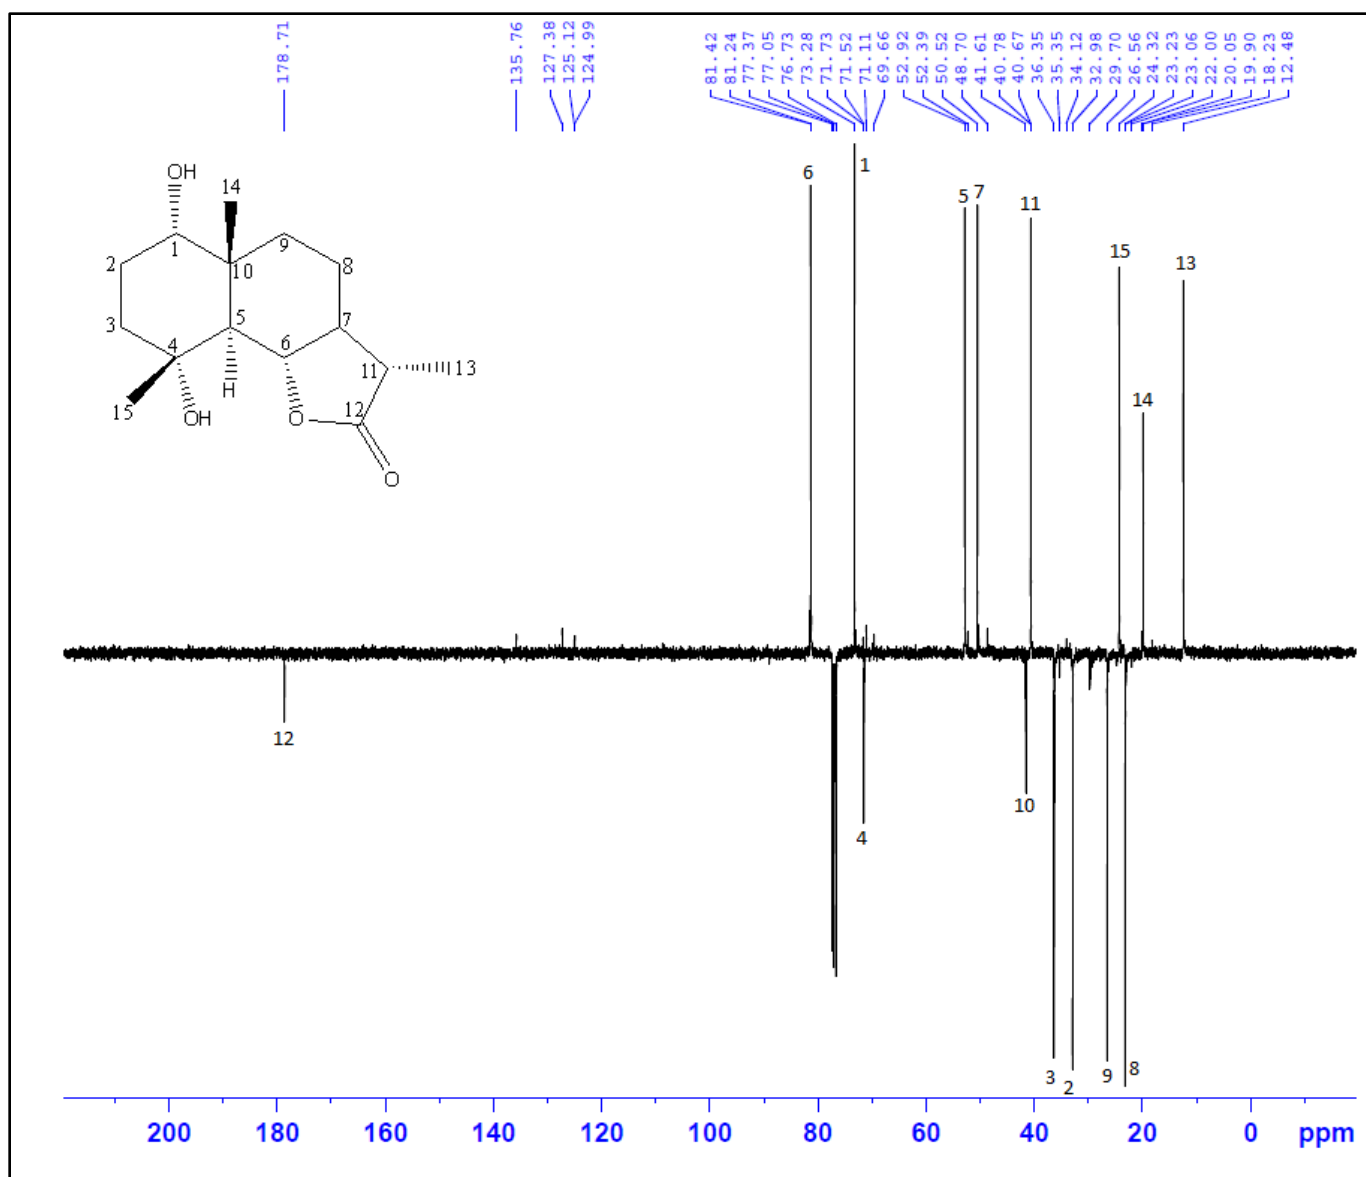

**Figure S11:**  $^{13}\text{C}$ -NMR spectrum of (2) ( $\text{CDCl}_3$ , 125 MHz).

### NMR spectra of second metabolite (3)

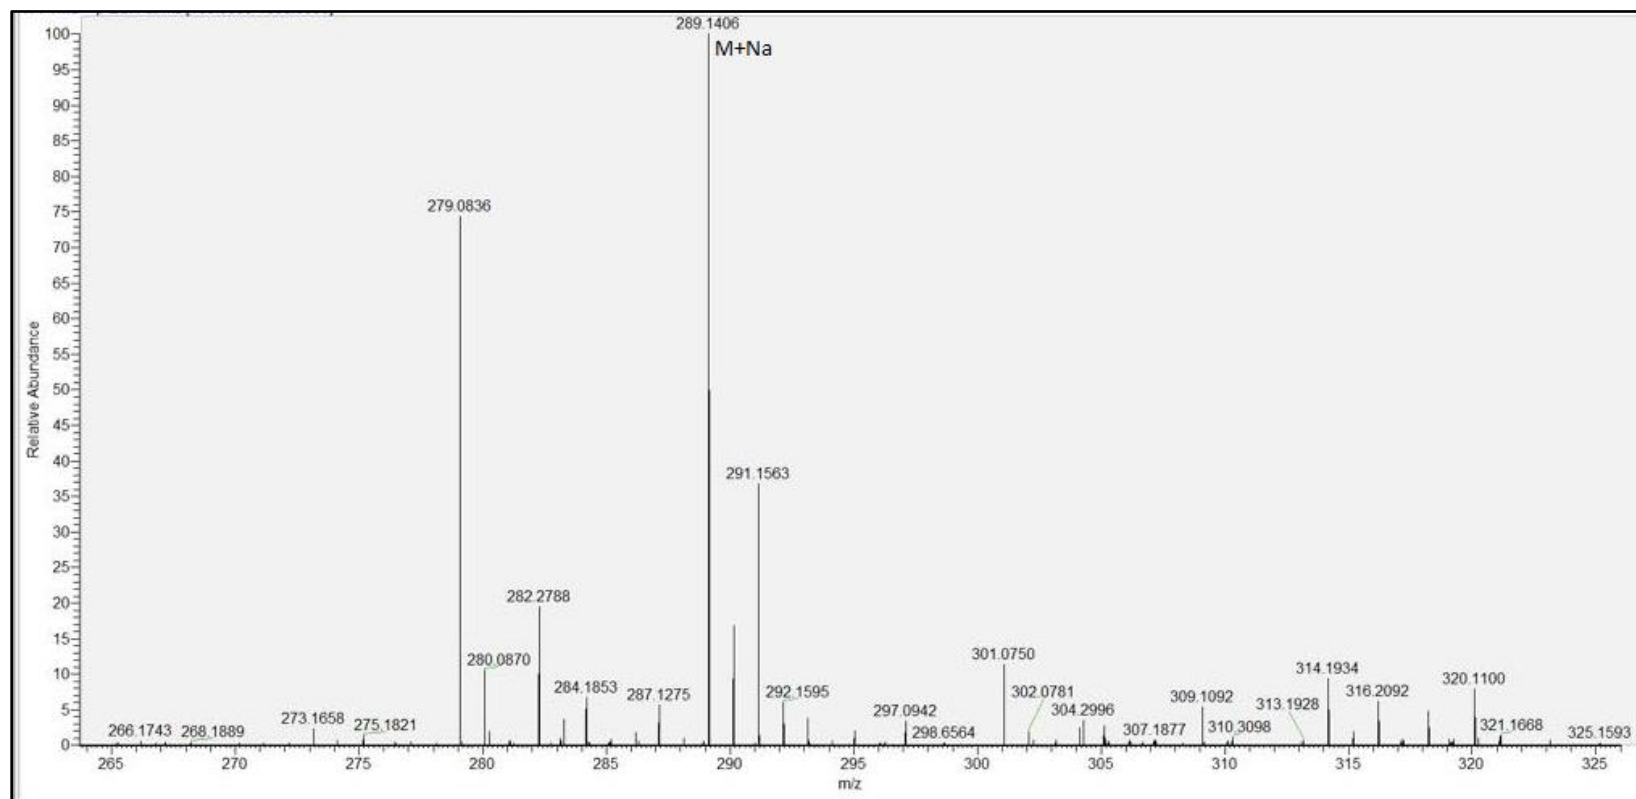

Figure S12: HRESIMS spectrum of (3a)

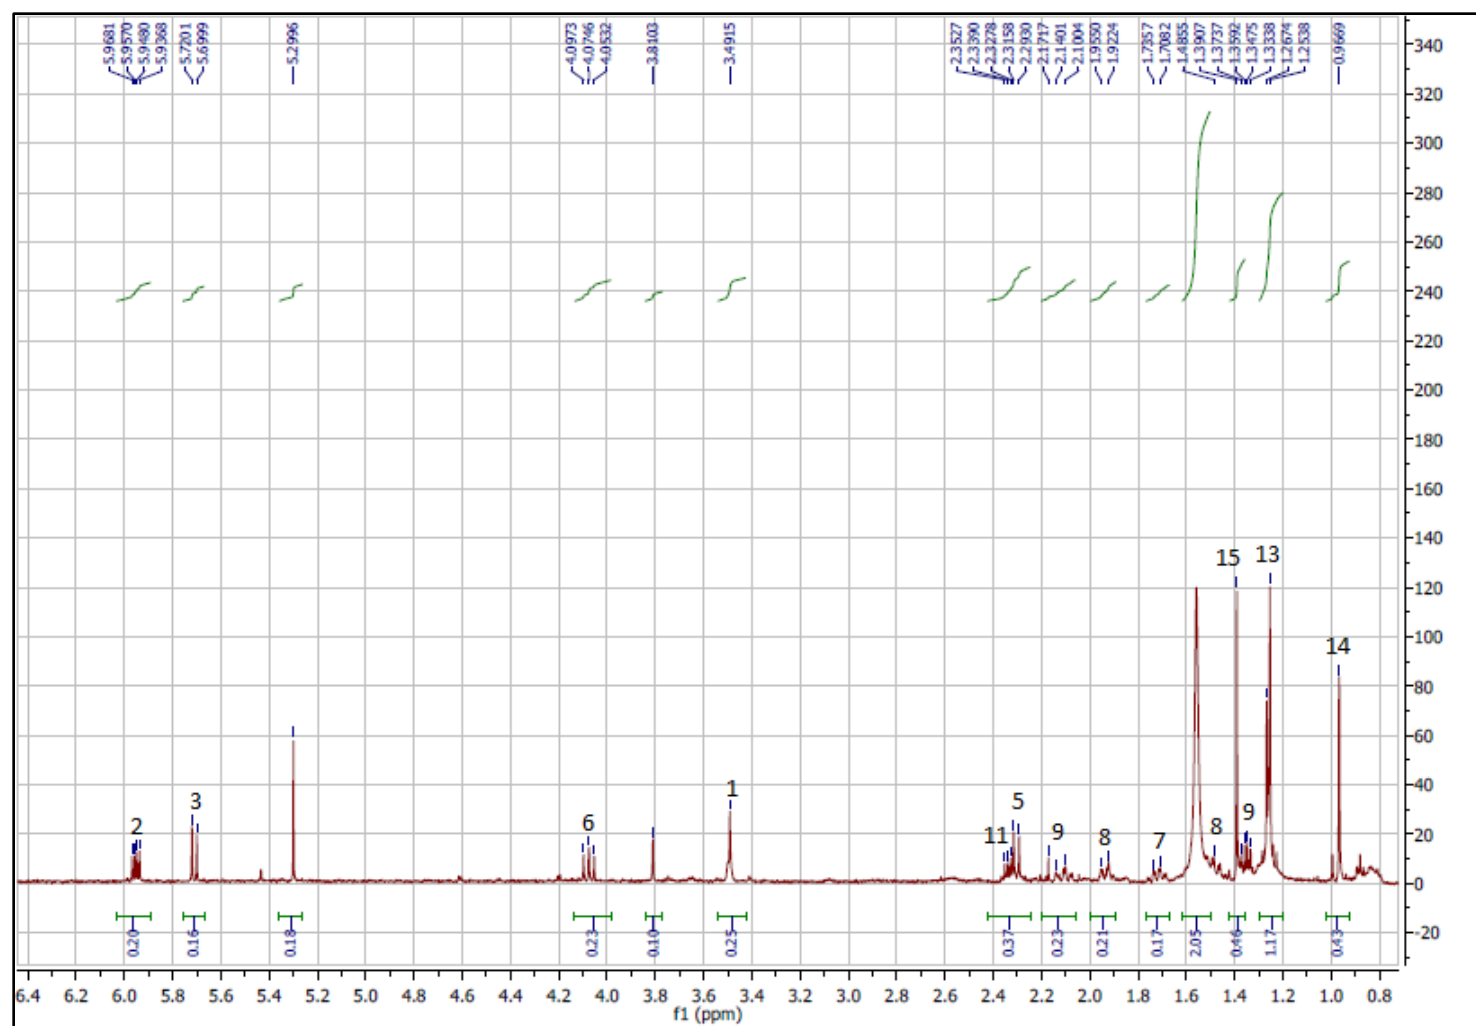

**Figure S13:**  $^1\text{H}$ -NMR spectrum of (3a) ( $\text{CDCl}_3$ , 500MHz).

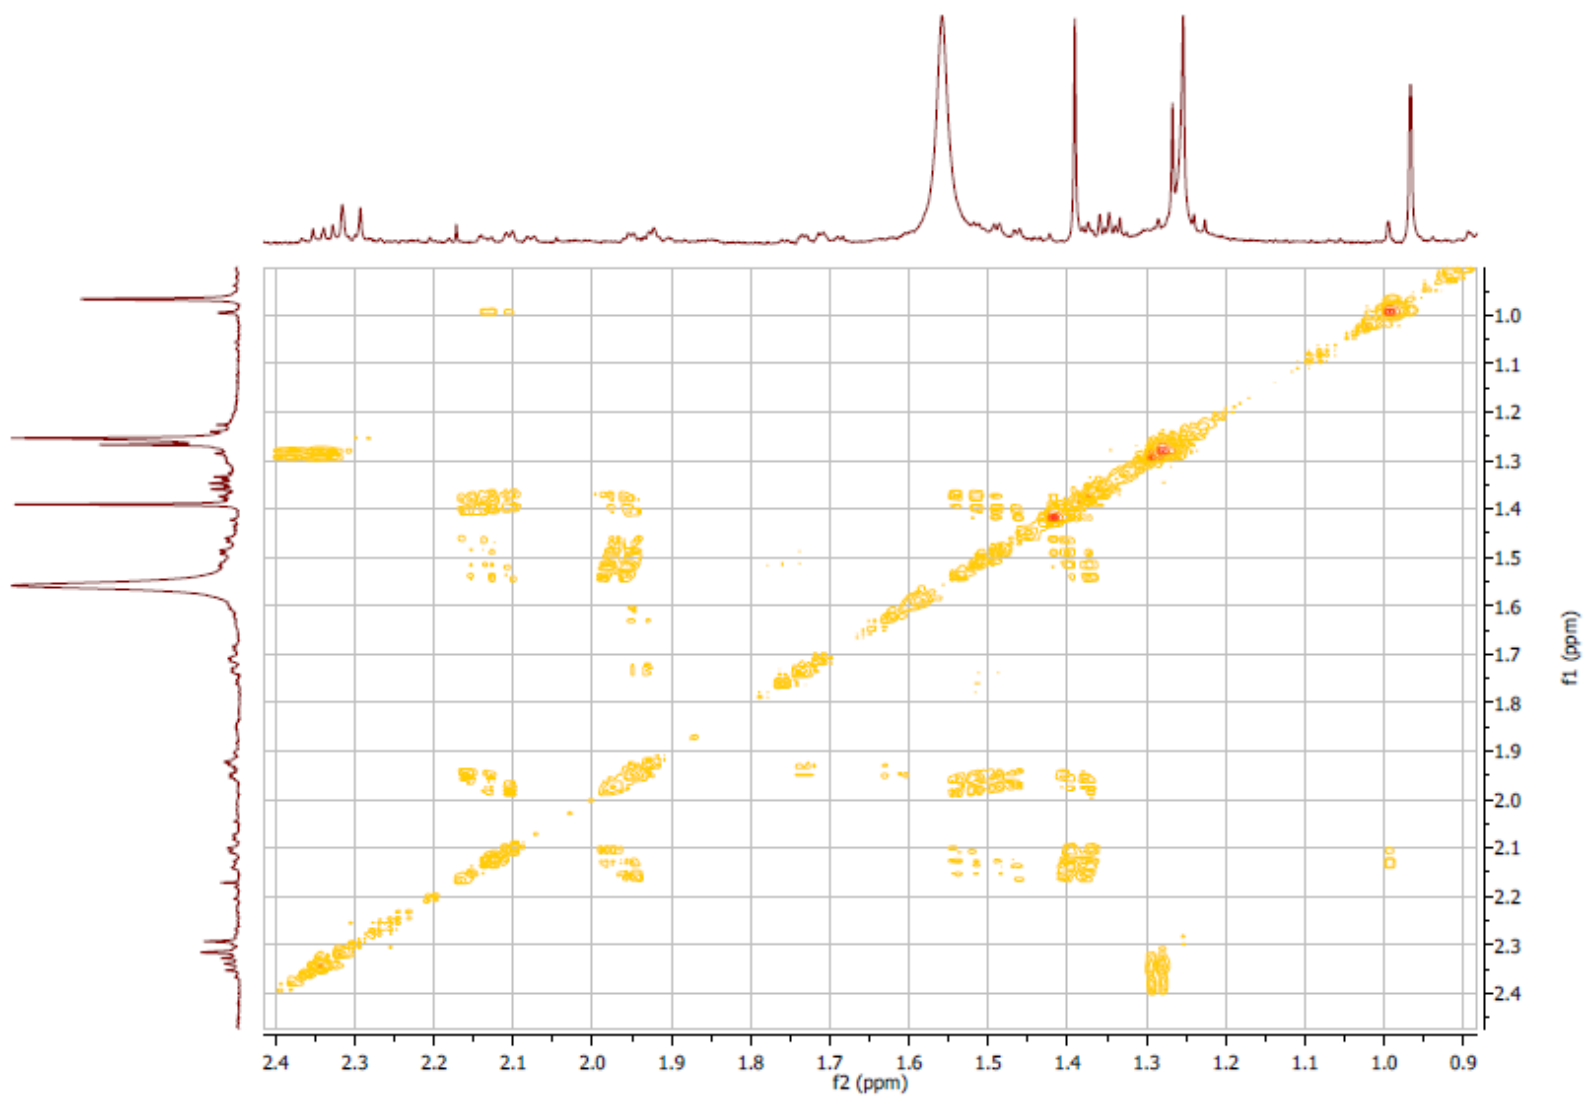

**Figure S14:** COSY spectrum of (3a)



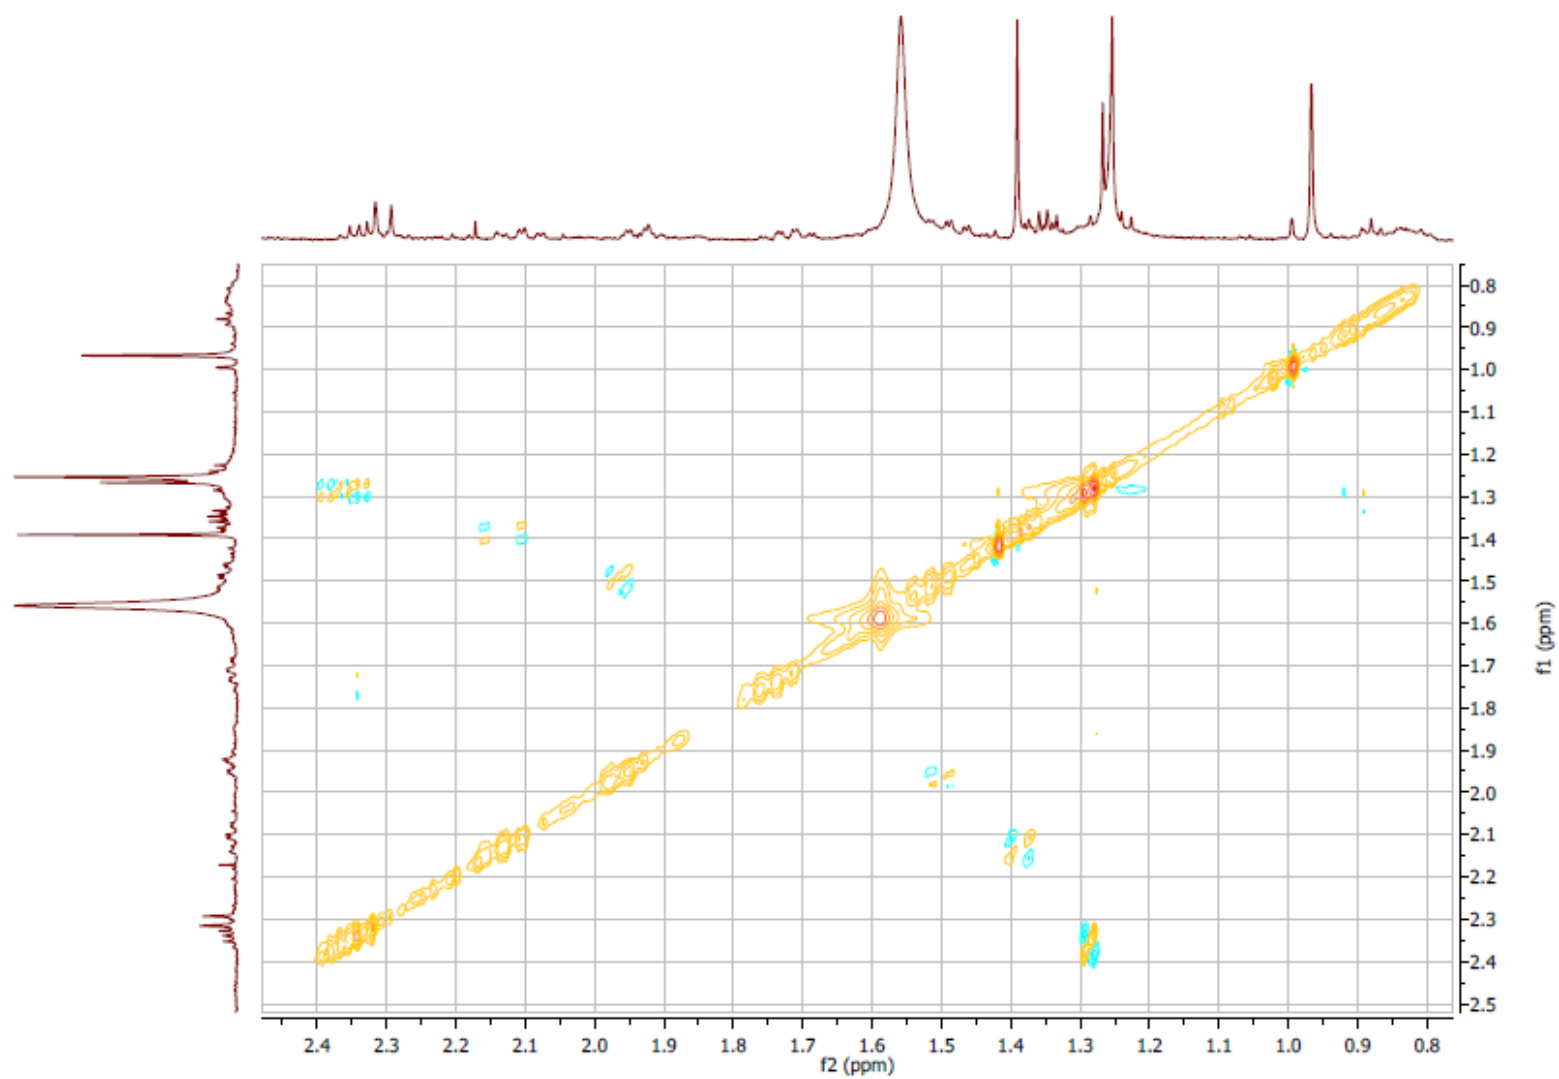

**Figure S15:** NOESY spectrum of (3a)

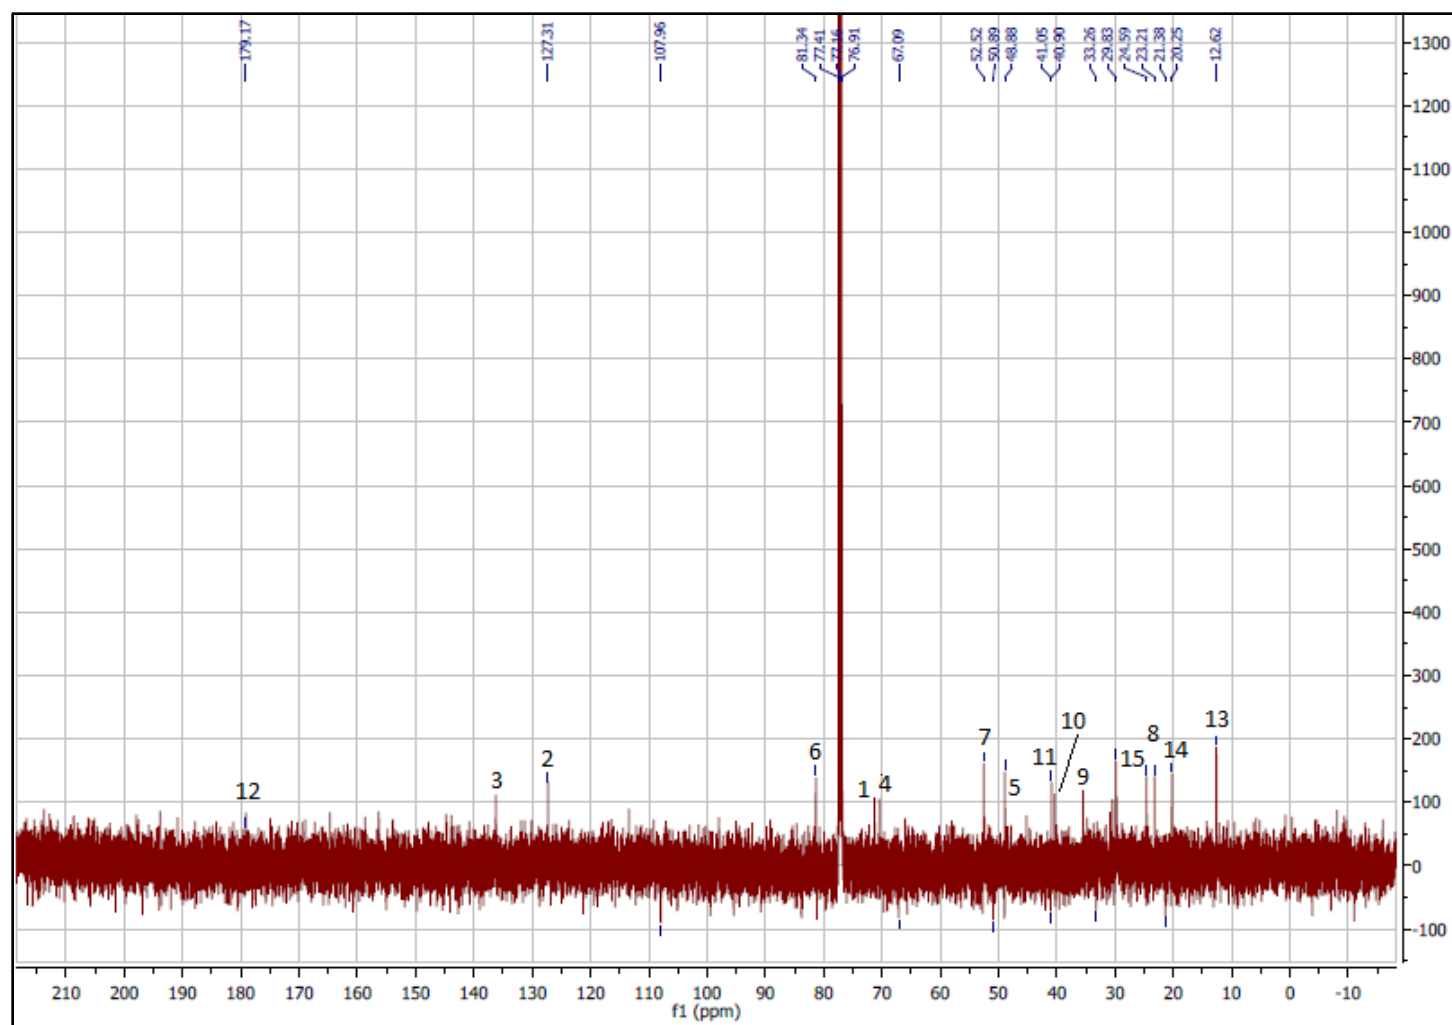

**Figure S16:**  $^{13}\text{C}$ -NMR spectrum of (3a) ( $\text{CDCl}_3$ , 125 MHz).

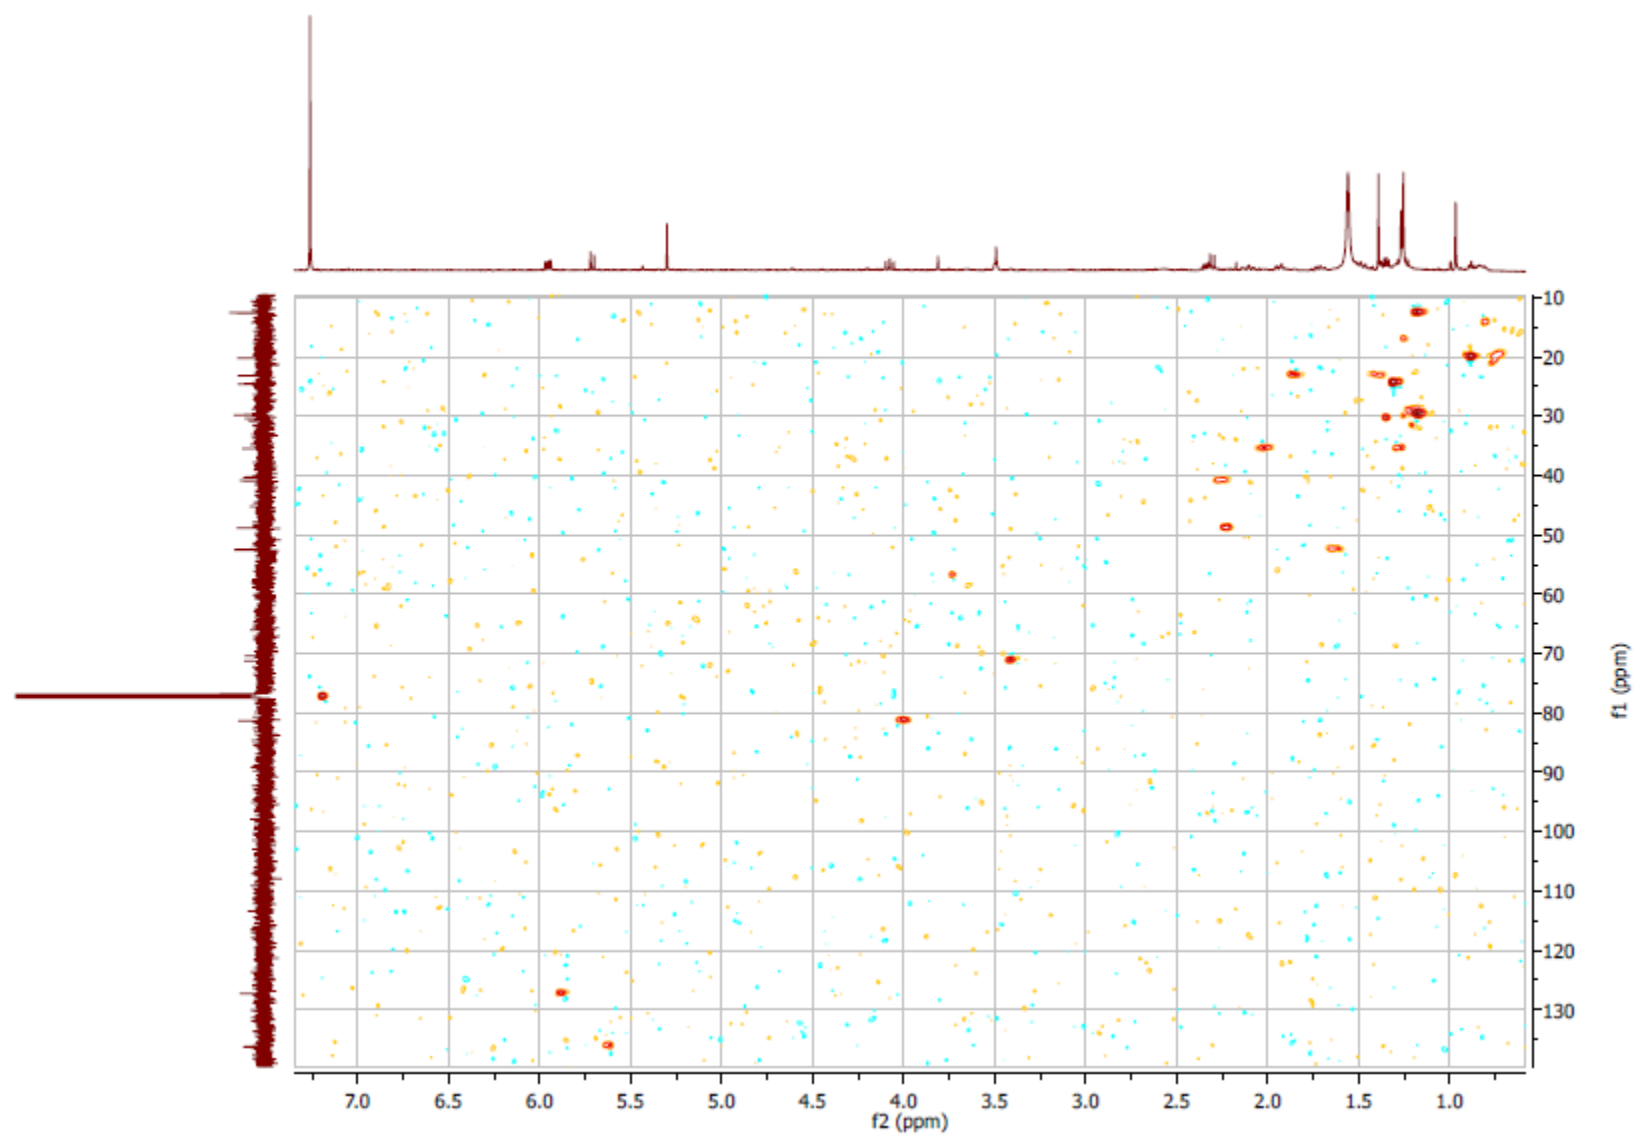

**Figure S17:** HSQC spectrum of (3a)

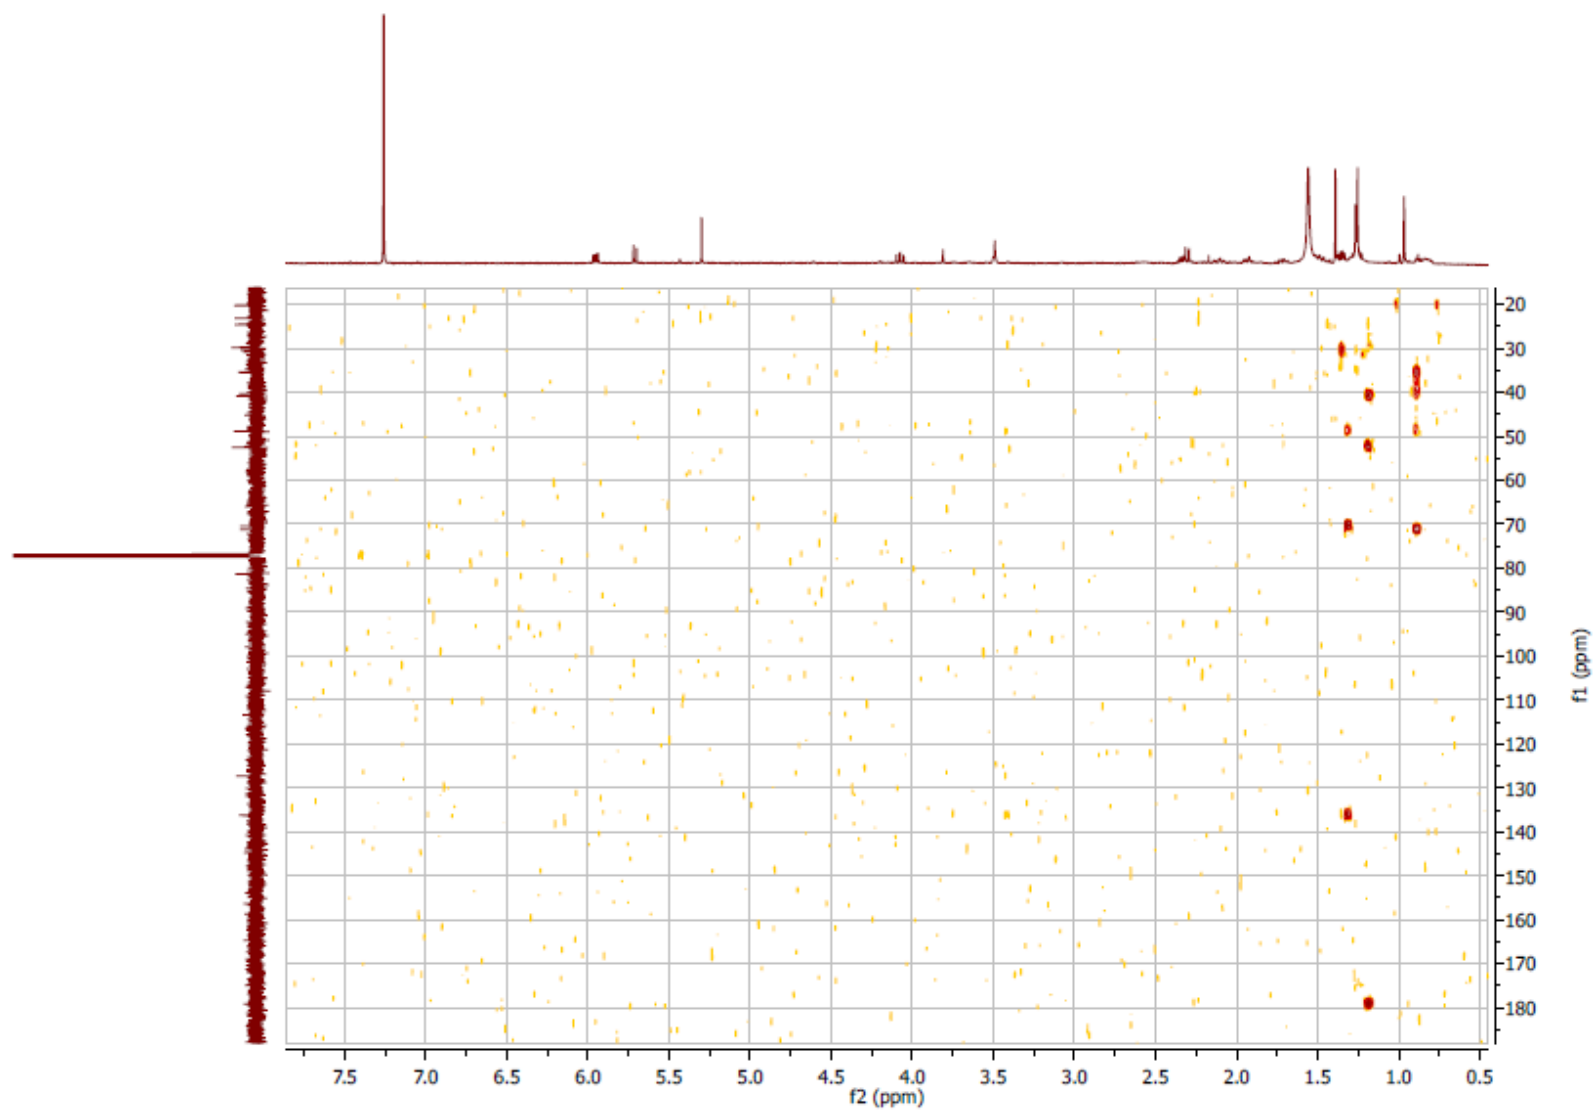

**Figure S18:** HMBC spectrum of (3a)

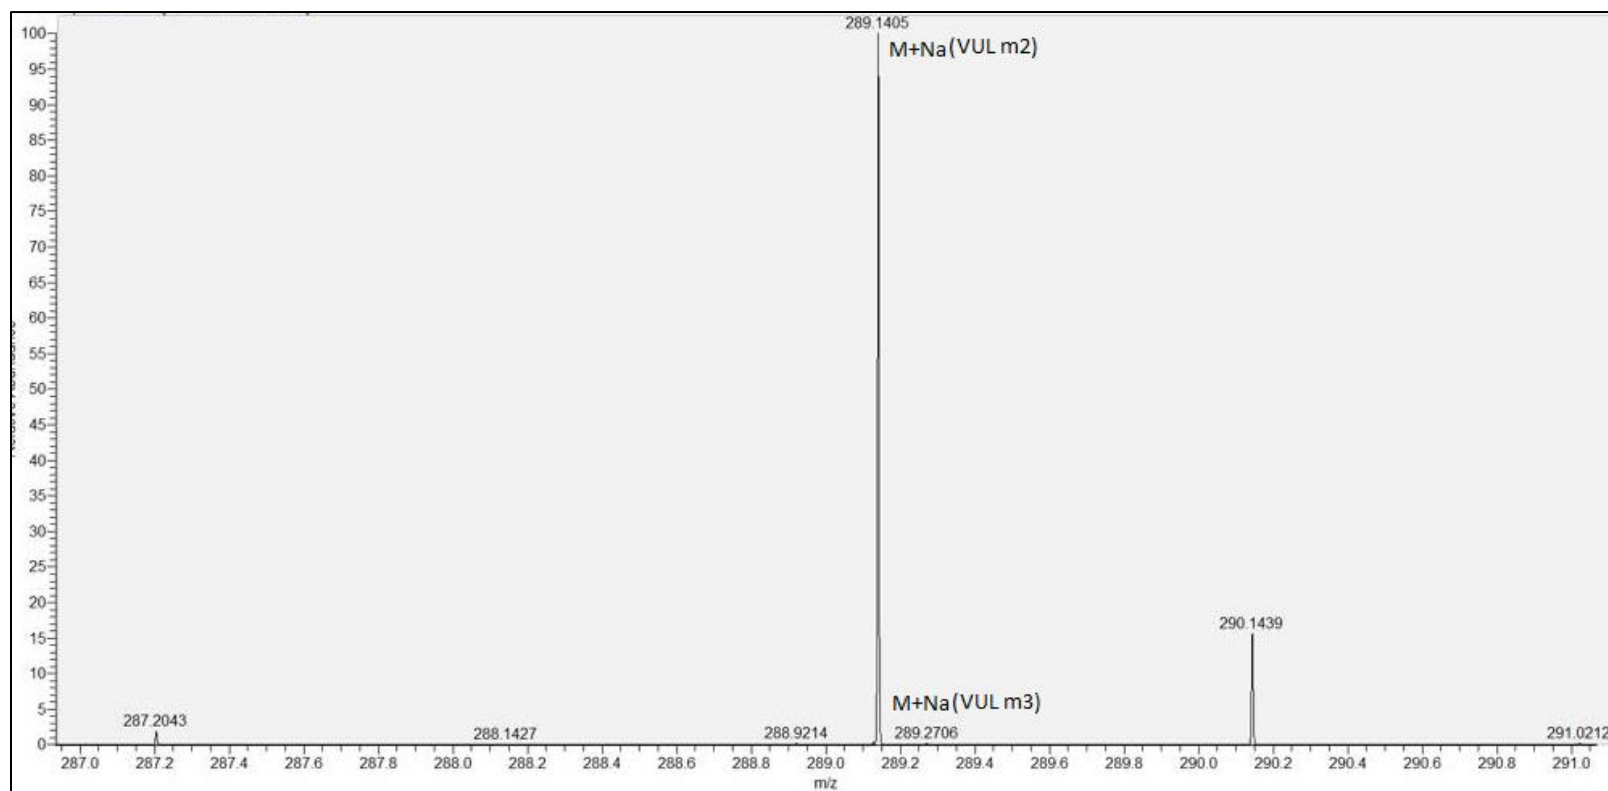

**Figure S19:** HRESIMS spectrum of (3a, b)

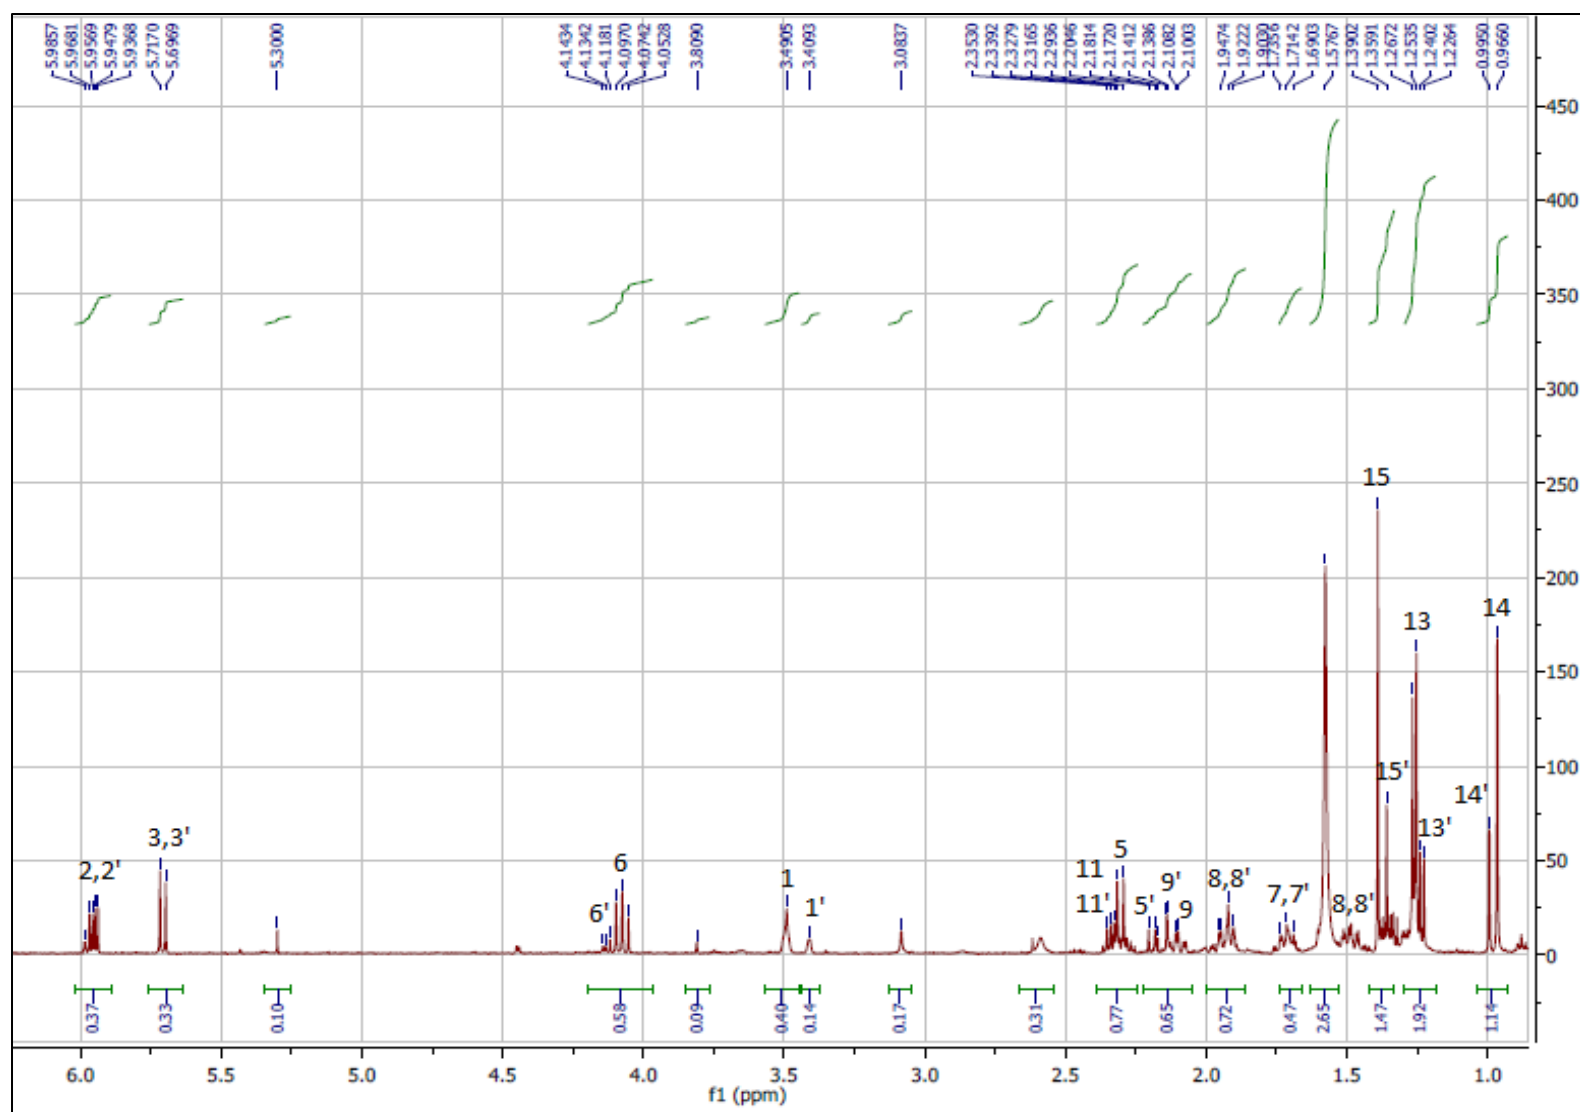

**Figure S20:**  $^1\text{H}$ -NMR spectrum of (3a,b) ( $\text{CDCl}_3$ , 500 MHz).

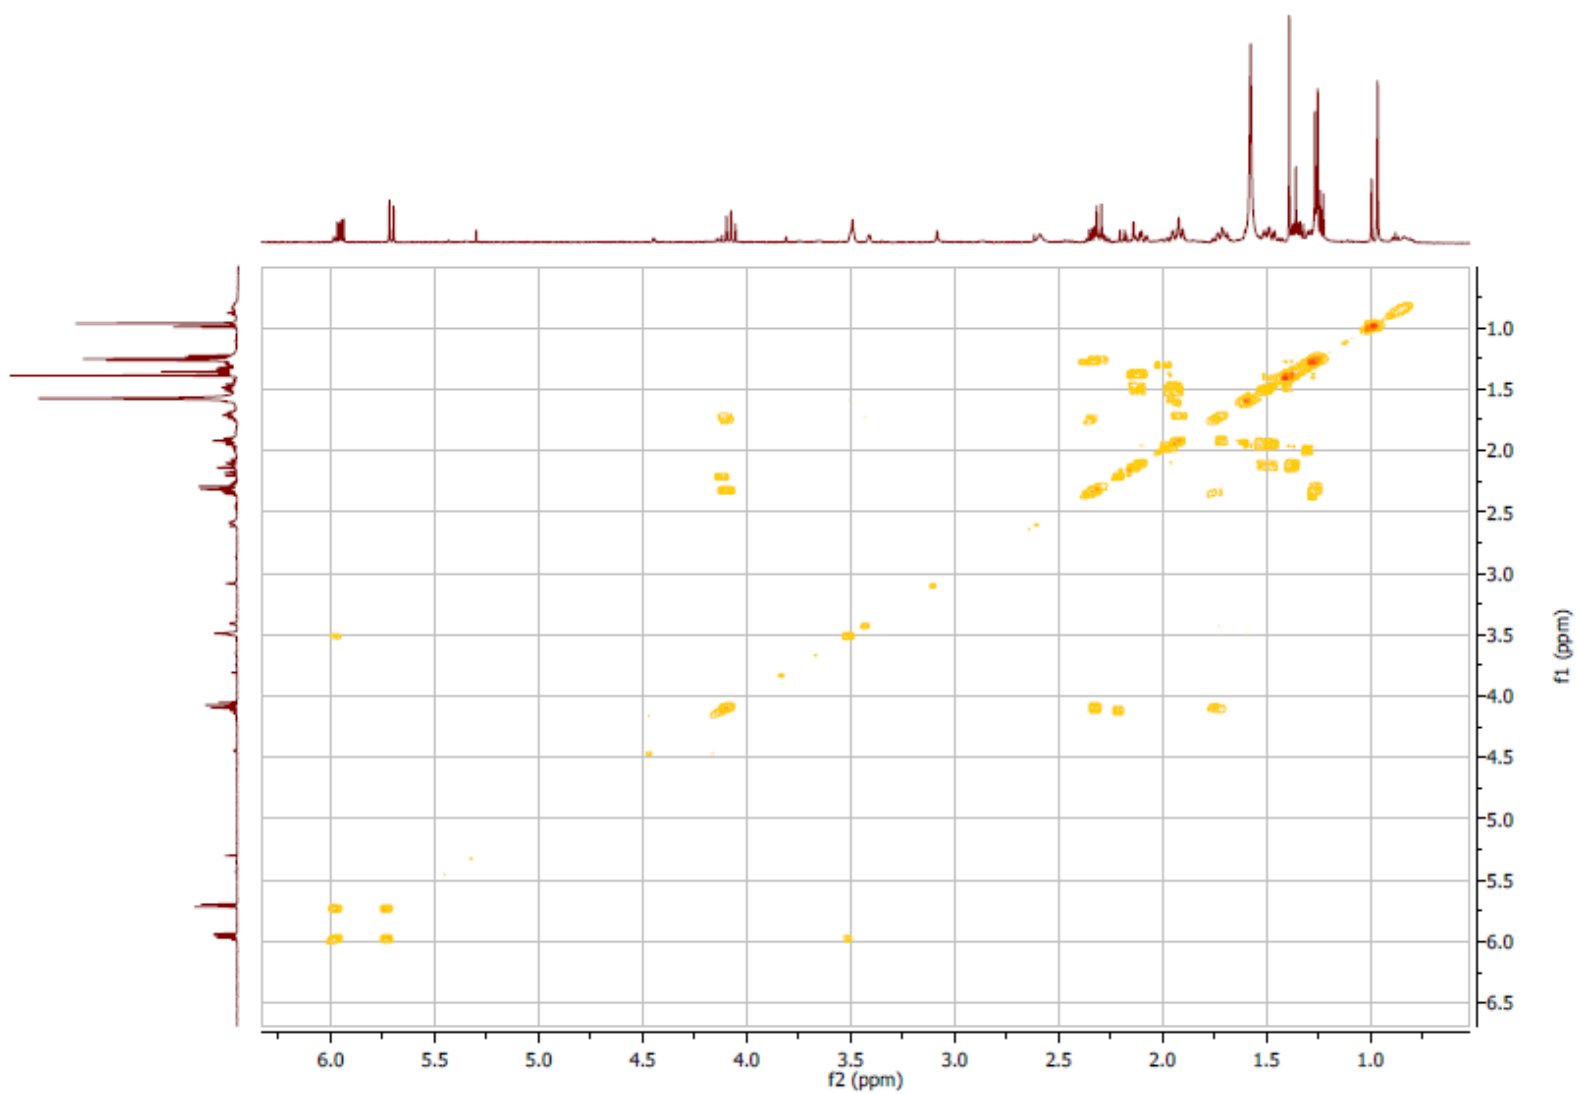

**Figure S21:** COSY spectrum of (3a,b)

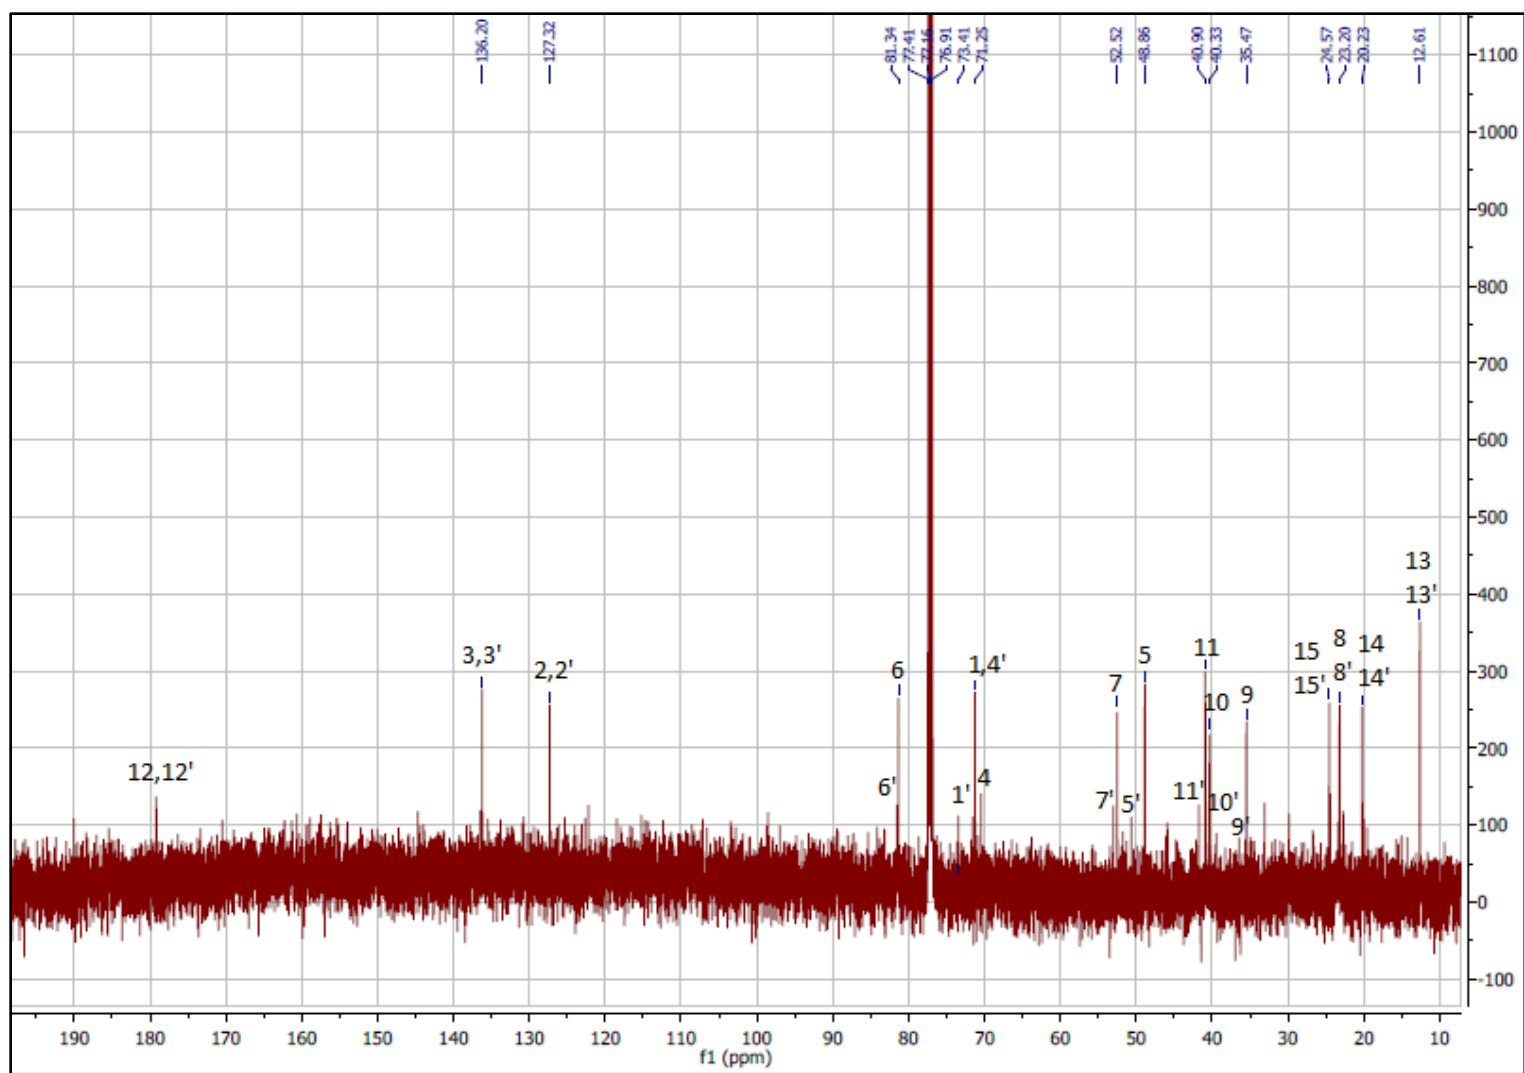

**Figure S22:**  $^{13}\text{C}$ -NMR spectrum of (3a,b) ( $\text{CDCl}_3$ , 125 MHz).



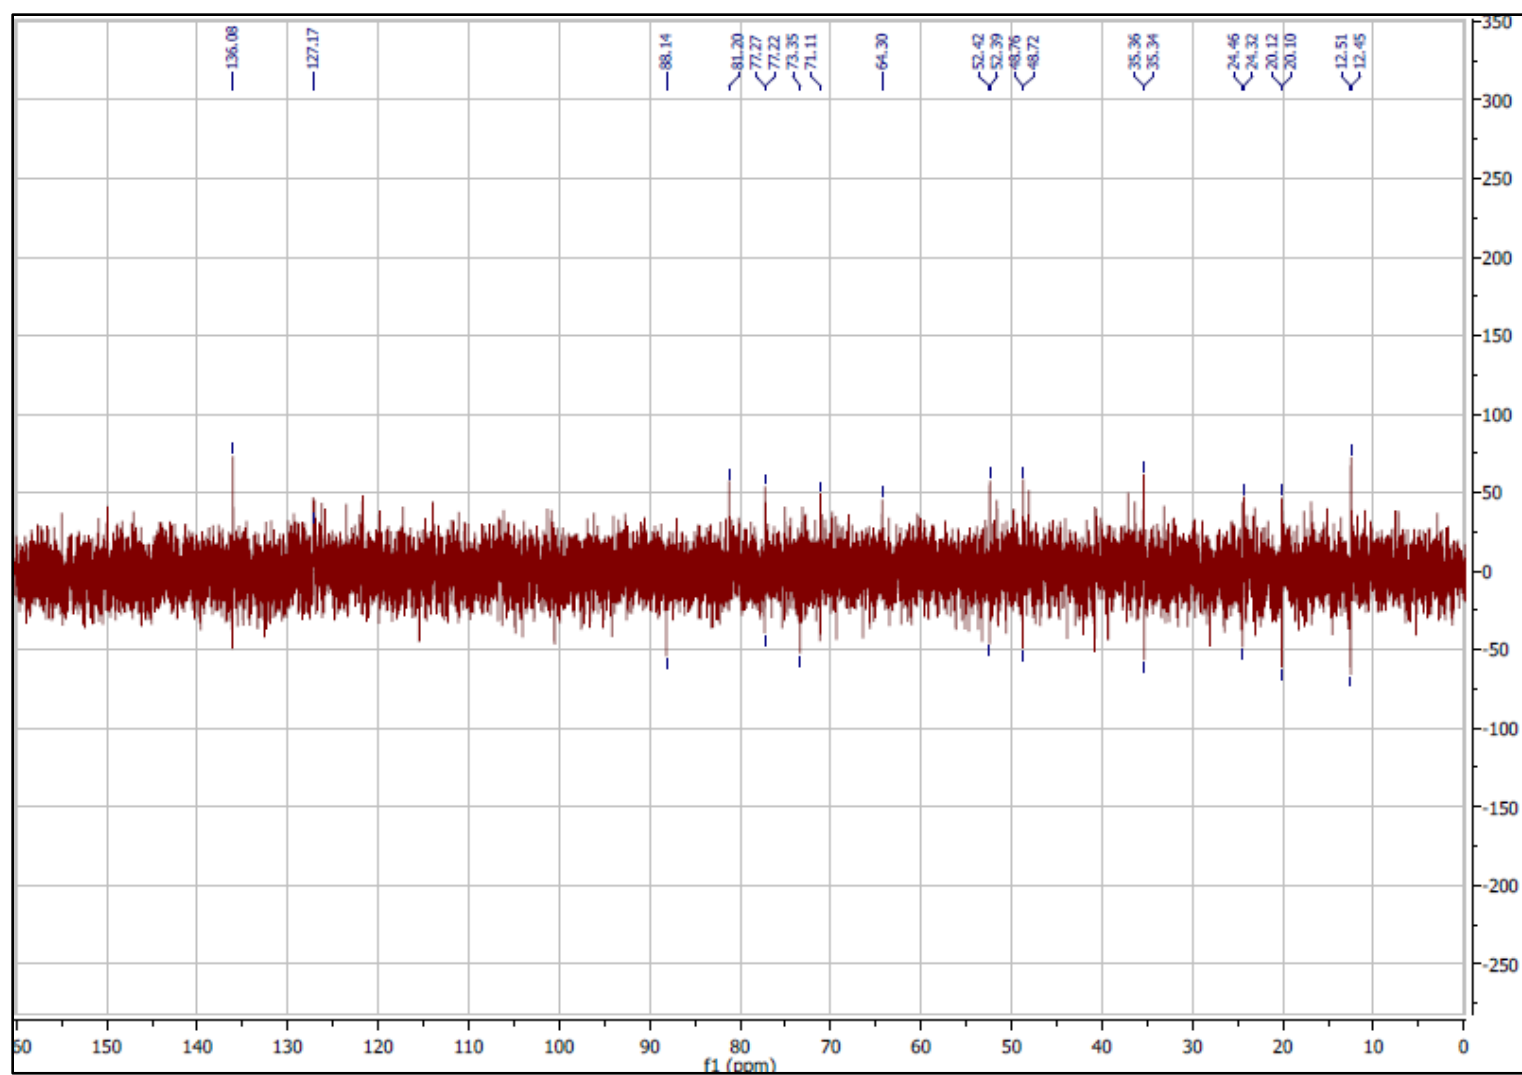

**Figure S23:** DEPT 135 spectrum of (3a,b)

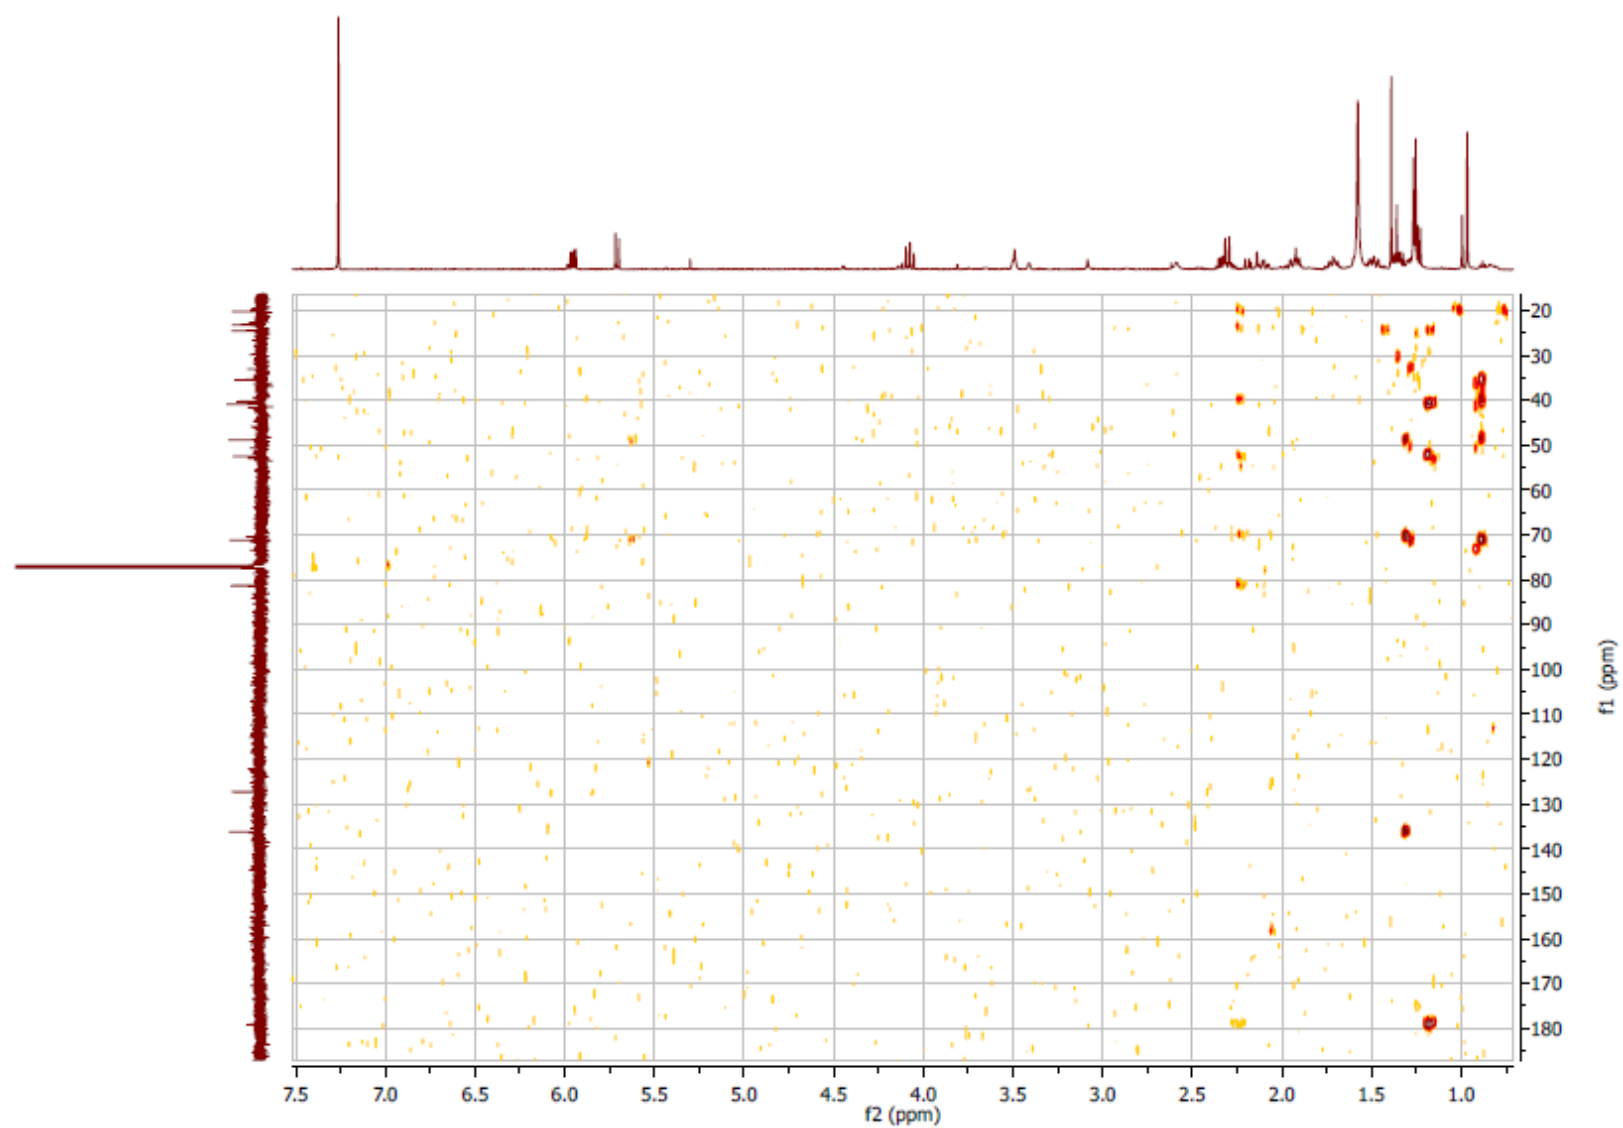

**Figure S24:** HMBC spectrum of (3a,b)

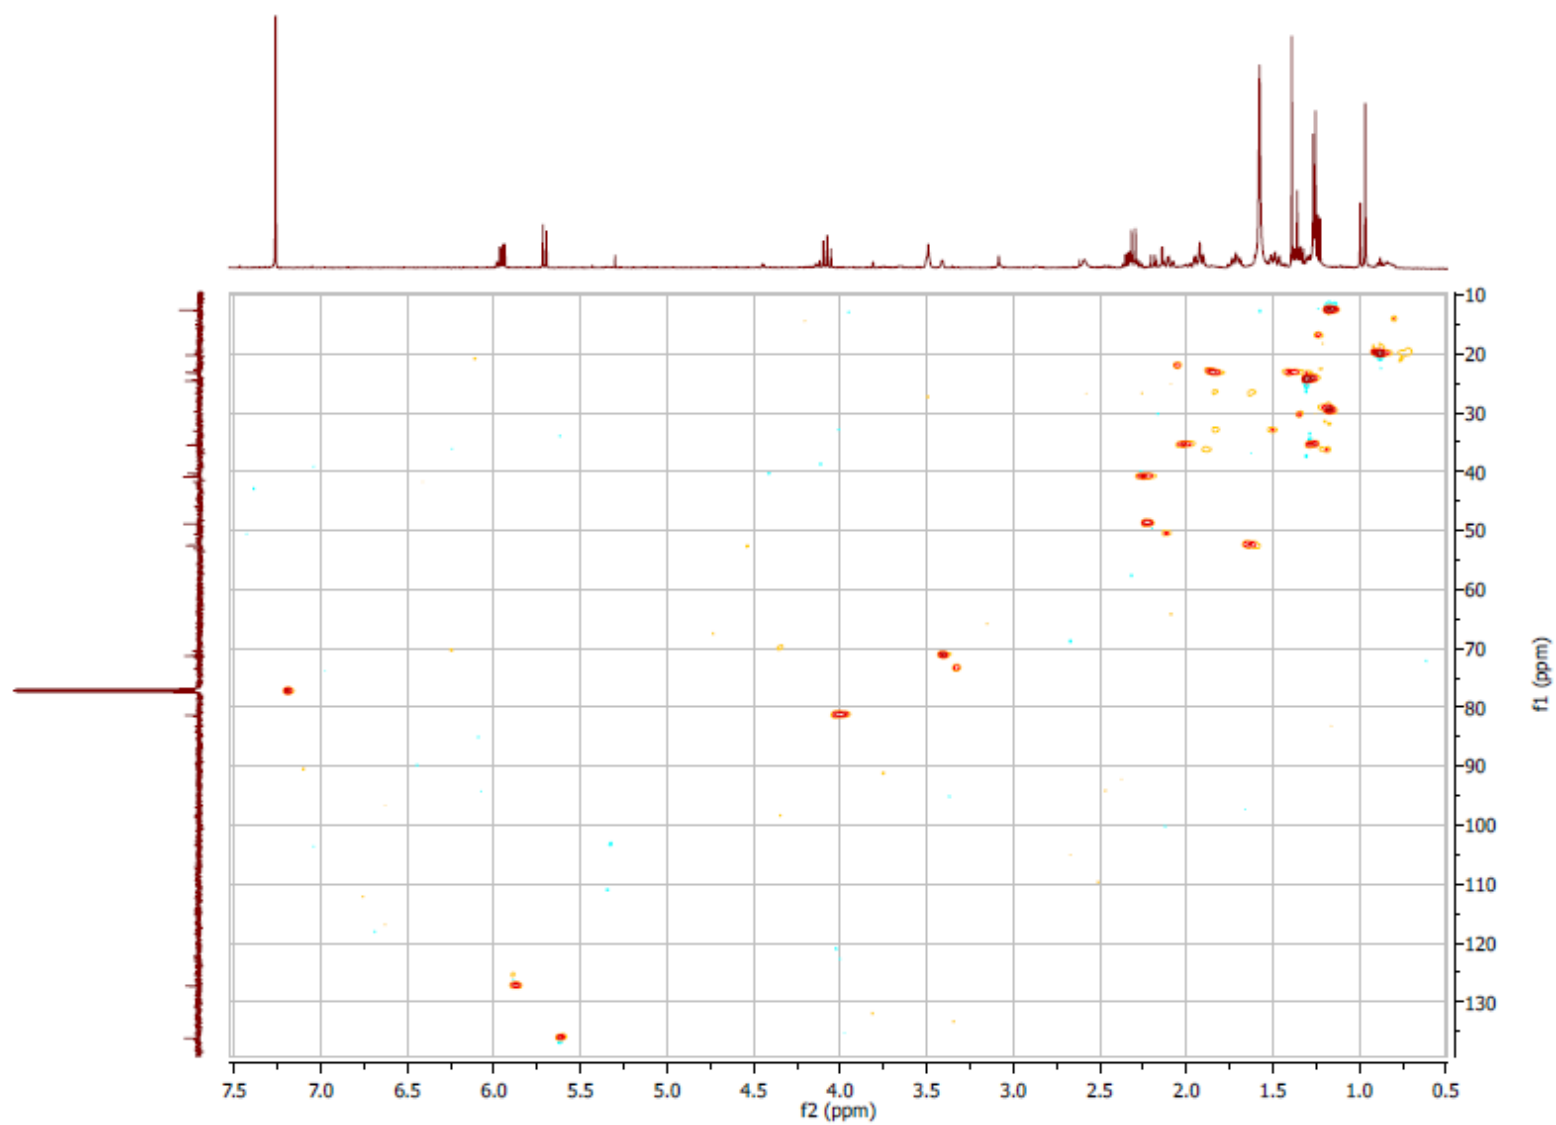

**Figure S25:** HSQC spectrum of (3a,b)
